# Supplementary material for: Combustion synthesized La2O3and La(OH)3: recyclable catalytic activity towards Knoevenagel and Hantzsch reactions
Source: Royal Society of Chemistry journal article supplement (doi:10.1039/c4ra08353a), 2014-10-15

**Combustion synthesized  $\text{La}_2\text{O}_3$  and  $\text{La}(\text{OH})_3$ :Recyclable catalytic activity towards**

**Knoevenagel and Hantzsch reactions**

Bhanu P Gangwar<sup>†</sup>, VeerabhadraiahPalakollu<sup>†</sup>, Archana Singh, SriramKanvah\* and Sudhanshu  
Sharma\*

**Supporting Information**

Table S1: Knoevenagel – condensation reaction

| Entry | Reaction with La <sub>2</sub> O <sub>3</sub> |           | Reaction with La(OH) <sub>3</sub> |           |
|-------|----------------------------------------------|-----------|-----------------------------------|-----------|
|       | Time                                         | Yield (%) | Time                              | Yield (%) |
| 1a    | 120                                          | 81        | 125                               | 81        |
| 1b    | 190                                          | 76        | 220                               | 79        |
| 1c    | 140                                          | 79        | 160                               | 80        |
| 1d    | 110                                          | 89        | 130                               | 82        |
| 1e    | 110                                          | 80        | 160                               | 78        |
| 1f    | 150                                          | 82        | 160                               | <b>75</b> |
| 1g    | 160                                          | 78        | 170                               | 80        |
| 1h    | 140                                          | 80        | 180                               | 82        |
| 1i    | 160                                          | 76        | 190                               | 81        |

Table S2:Hantzsch Reaction

| Entry | Reaction with La <sub>2</sub> O <sub>3</sub> |           | Reaction with La(OH) <sub>3</sub> |           |
|-------|----------------------------------------------|-----------|-----------------------------------|-----------|
|       | Time                                         | Yield (%) | Time                              | Yield (%) |
| 2a    | 120                                          | 81        | 130                               | 84        |
| 2b    | 140                                          | 76        | 160                               | 79        |
| 2c    | 110                                          | 79        | 130                               | 80        |
| 2d    | 150                                          | 89        | 160                               | 82        |
| 2e    | 160                                          | 80        | 180                               | 83        |
| 2f    | 160                                          | 82        | 190                               | 85        |

Table S3: Effect of catalyst loading on the reactivity of substrates in Knoevenagel (1a-Table 1) and Hantzsch (2d, Table-2) reactions in DMSO.

| Loading (equiv) | Knoevenagel |           | Hantzsch   |           |
|-----------------|-------------|-----------|------------|-----------|
|                 | Time (min)  | Yield (%) | Time (min) | Yield (%) |
| 1               | 30          | 85        | 50         | 79        |
| 0.6             | 80          | 85        | 90         | 81        |
| 0.3             | 120         | 81        | 150        | 82        |
| 0.1             | 160         | 83        | 170        | 81        |
| 0.05            | 360         | 81        | 390        | 80        |

<sup>1</sup>H NMR Spectrum of 2-benzylidenemalononitrile(1a)

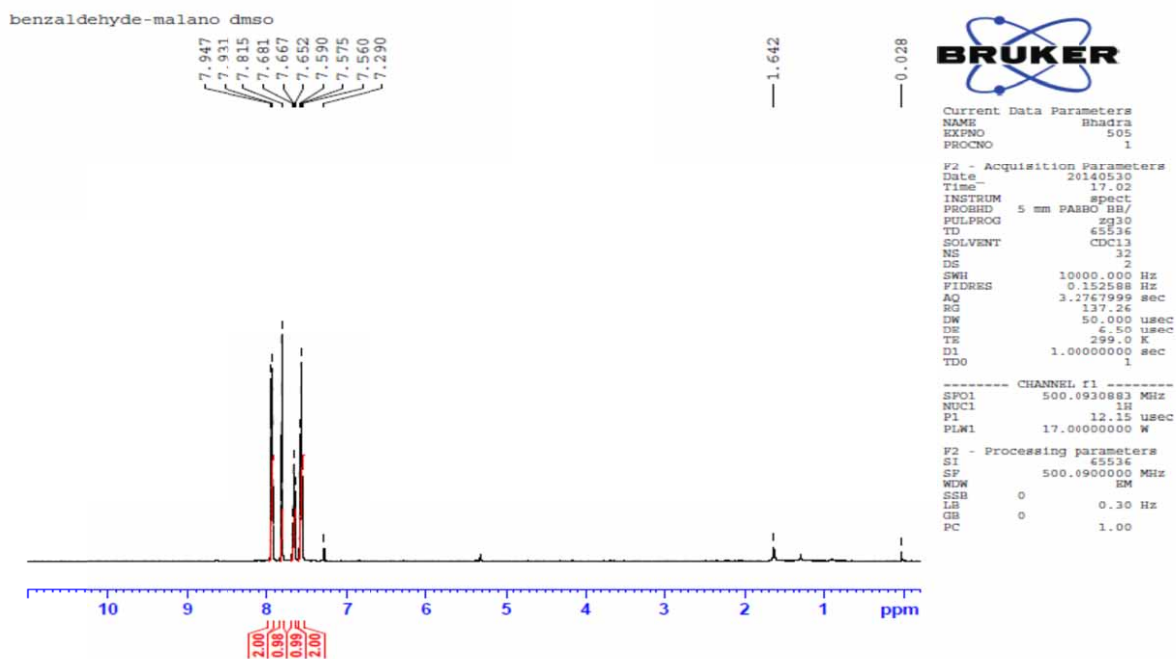

benzaldehyde-malano dmsd

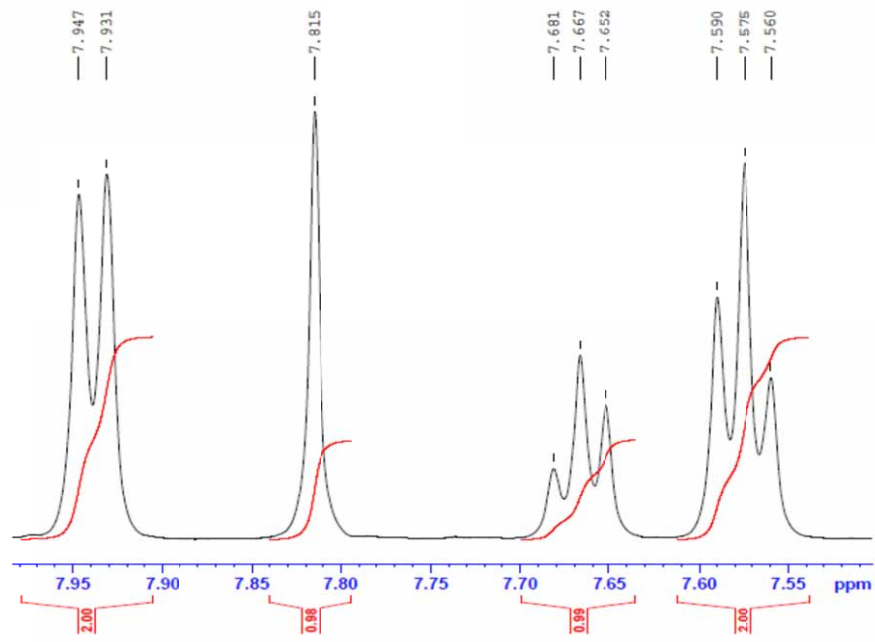

**BRUKER**

Current Data Parameters  
NAME Bhadra  
EXPNO 505  
PROCNO 1

F2 - Acquisition Parameters  
Date\_ 20140530  
Time 17.02  
INSTRUM spect  
PROBHD 5 mm PABBO BB/  
PULPROG zg30  
TD 65536  
SOLVENT CDCl3  
NS 32  
DS 2  
SWH 10000.000 Hz  
FIDRES 0.152588 Hz  
AQ 3.2767999 sec  
RG 137.26  
DW 50.000 usec  
DE 6.50 usec  
TE 299.0 K  
D1 1.00000000 sec  
TDO 1

----- CHANNEL f1 -----  
SFO1 500.0930883 MHz  
NUC1 1H  
P1 12.15 usec  
PLW1 17.00000000 W

F2 - Processing parameters  
SI 65536  
SF 500.0900000 MHz  
WDW EM  
SSB 0  
LB 0.30 Hz  
GB 0  
PC 1.00

### <sup>13</sup>C NMR Spectrum of 2-benzylidenemalononitrile

benzaldehyde-malano dmsd

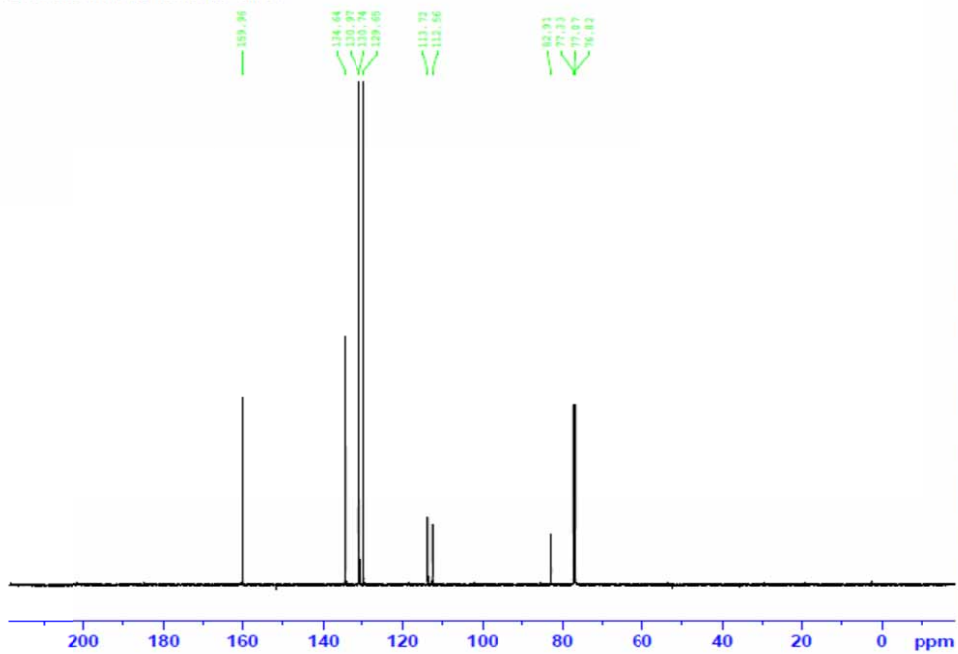

**BRUKER**

Current Data Parameters  
NAME Bhadra  
EXPNO 506  
PROCNO 1

F2 - Acquisition Parameters  
Date\_ 20140530  
Time 18.02  
INSTRUM spect  
PROBHD 5 mm PABBO BB/  
PULPROG zgpg30  
TD 65536  
SOLVENT CDCl3  
NS 1024  
DS 4  
SWH 29761.904 Hz  
FIDRES 0.454131 Hz  
AQ 1.1010048 sec  
RG 112.97  
DW 16.800 usec  
DE 6.50 usec  
TE 301.2 K  
D1 2.00000000 sec  
D11 0.03000000 sec  
TDO 1

----- CHANNEL f1 -----  
SFO1 125.7603047 MHz  
NUC1 13C  
P1 8.90 usec  
PLW1 29.00000000 W

----- CHANNEL f2 -----  
SFO2 500.0920004 MHz  
NUC2 1H  
CPDPRG[2] waltz16  
PCPD2 80.00 usec  
PLW2 17.00000000 W  
PLW12 0.52061999 W  
PLW13 0.33320001 W

F2 - Processing parameters  
SI 32768  
SF 125.7477310 MHz  
WDW EM  
SSB 0  
LB 1.00 Hz  
GB 0  
PC 1.40

# <sup>1</sup>H NMR Spectrum of (Z)-2,3-diphenylacrylonitrile (1b)

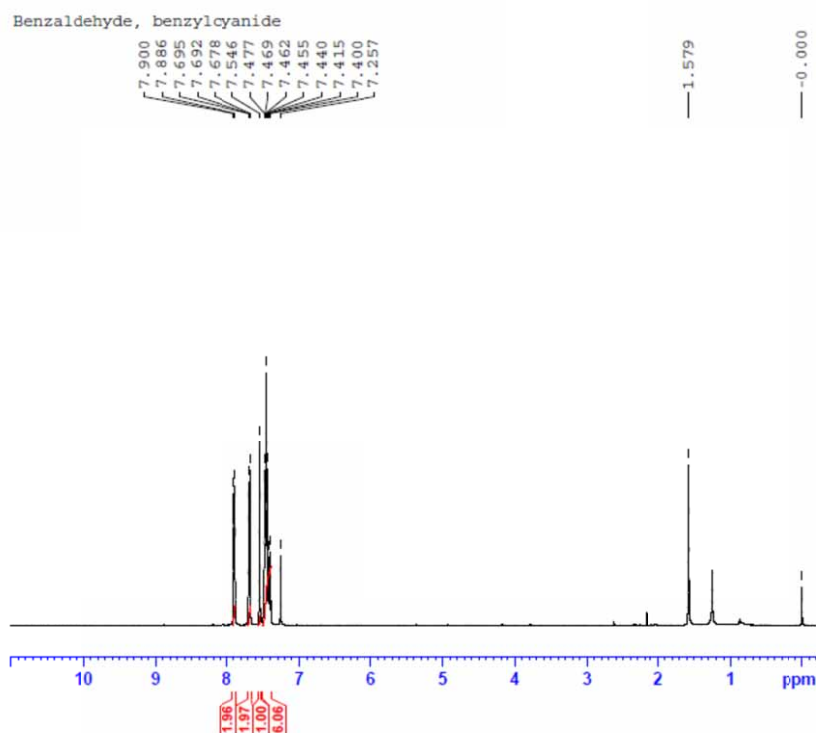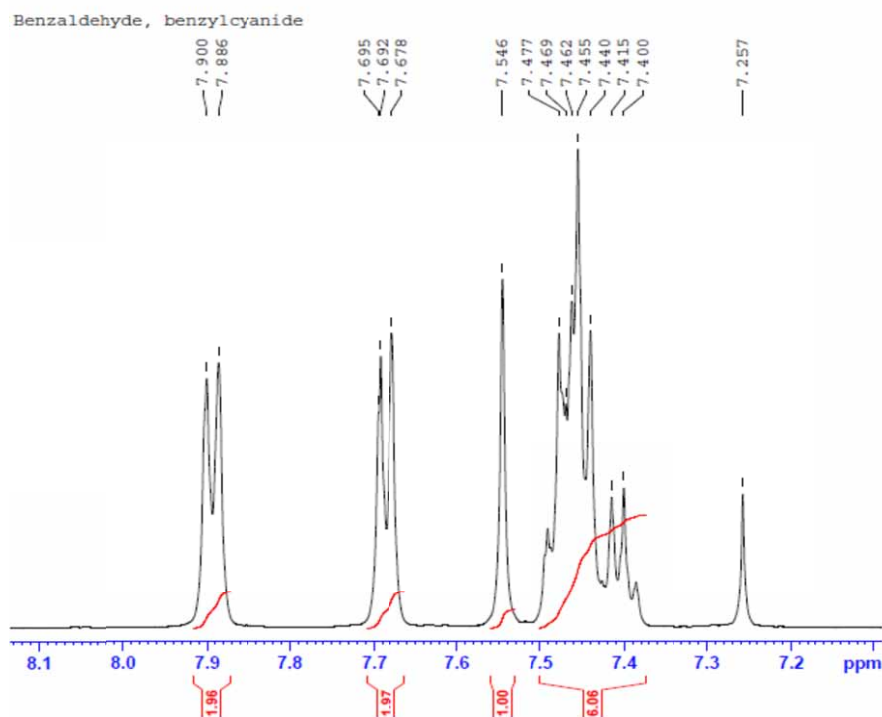

# <sup>13</sup>C NMR Spectrum of (Z)-2,3-diphenylacrylonitrile (1b)

benzaldehyde-benzylcyanide

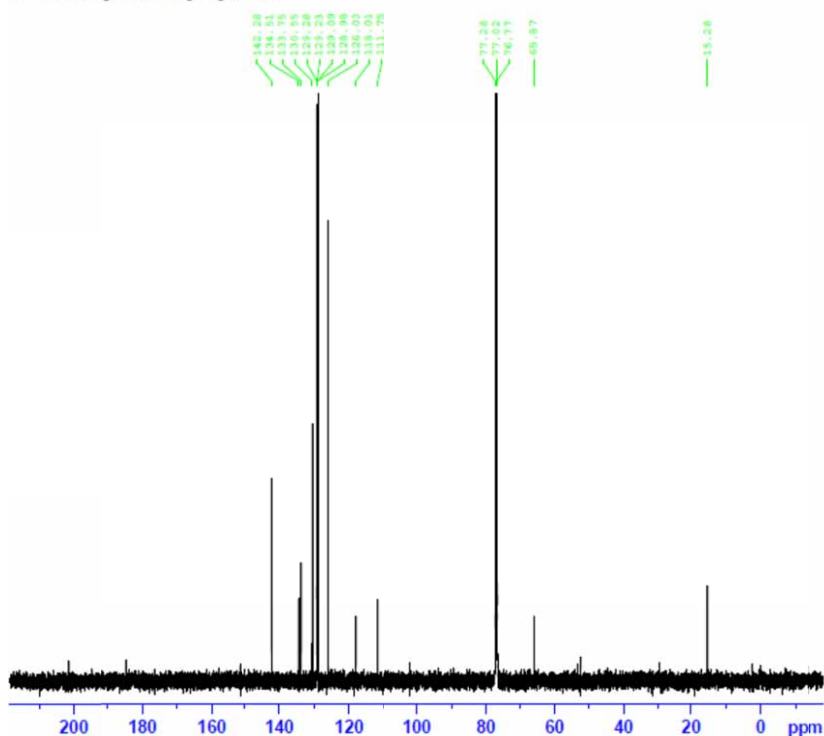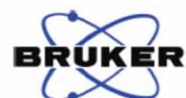

Current Data Parameters  
NAME Bhadra  
EXPNO 641  
PROCNO 1

F2 - Acquisition Parameters  
Date 20140709  
Time 20.30  
INSTRUM spect  
PROBHD 5 mm PABBO BB/  
PULPROG zgpg30  
TD 65536  
SOLVRHT CDC13  
NS 1024  
DS 4  
SWH 29761.904 Hz  
FIDRES 0.454131 Hz  
AQ 1.1010048 sec  
RG 112.97  
DW 16.800 usec  
DE 6.50 usec  
TE 298.3 K  
D1 2.0000000 sec  
D11 0.0300000 sec  
TDO 1

----- CHANNEL f1 -----  
SFO1 125.7603047 MHz  
NUC1 13C  
P1 8.90 usec  
PLW1 29.00000000 W

----- CHANNEL f2 -----  
SFO2 500.0920004 MHz  
NUC2 1H  
CPDPRG12 waltz16  
PCPD2 80.00 usec  
PLW2 17.00000000 W  
PLW12 0.52061999 W  
PLW13 0.33320001 W

F2 - Processing parameters  
SI 32768  
SF 125.7477310 MHz  
WDW EM  
SSB 0  
LB 1.00 Hz  
GB 0  
PC 1.40

# <sup>1</sup>H NMR Spectrum of 2-(4-methoxybenzylidene) malononitrile . Reaction was performed with lanthanum oxide prepared by urea as fuel.

methoxy, malano

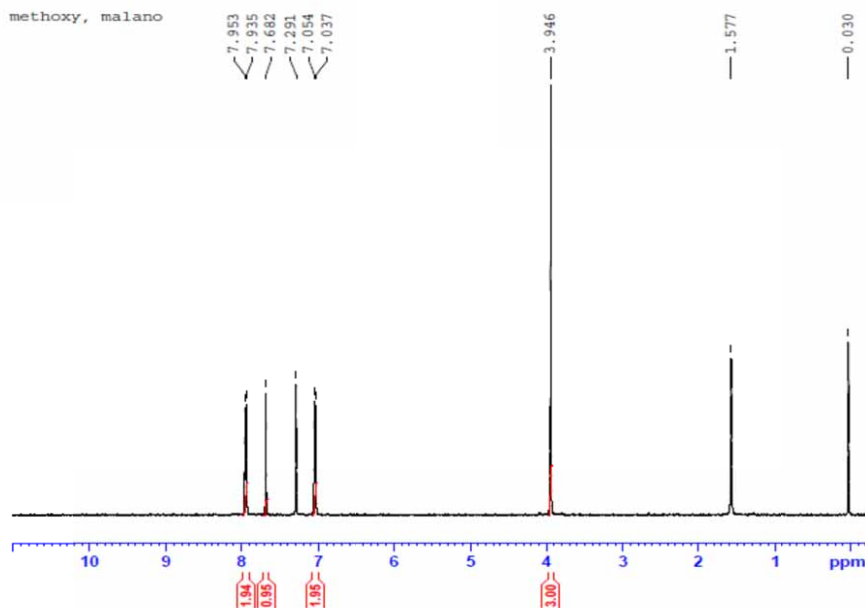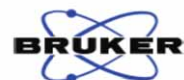

Current Data Parameters  
NAME Bhadra  
EXPNO 572  
PROCNO 1

F2 - Acquisition Parameters  
Date 20140613  
Time 14.35  
INSTRUM spect  
PROBHD 5 mm PABBO BB/  
PULPROG zg30  
TD 65536  
SOLVENT CDC13  
NS 32  
DS 2  
SWH 10000.000 Hz  
FIDRES 0.152588 Hz  
AQ 3.2767999 sec  
RG 200.08  
DW 50.000 usec  
DE 6.50 usec  
TE 300.0 K  
D1 1.0000000 sec  
TDO 1

----- CHANNEL f1 -----  
SFO1 500.0930883 MHz  
NUC1 1H  
P1 12.15 usec  
PLW1 17.00000000 W

F2 - Processing parameters  
SI 65536  
SF 500.0900000 MHz  
WDW RM  
SSB 0  
LB 0.30 Hz  
GB 0  
PC 1.00

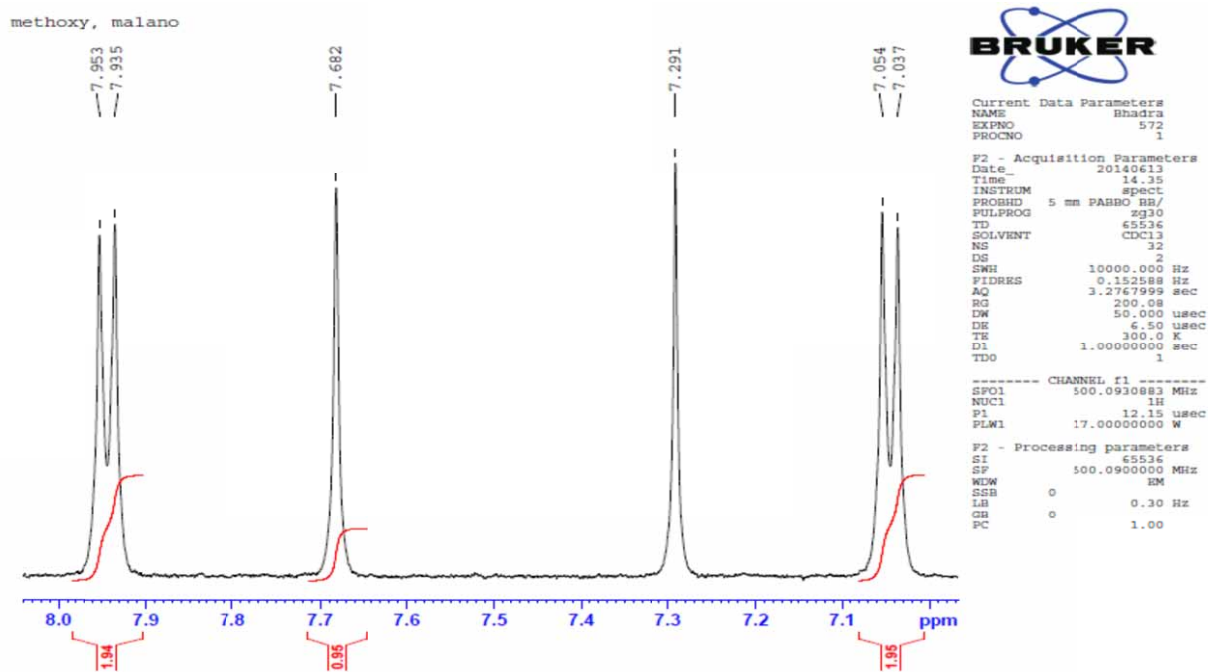

$^1\text{H}$  NMR Spectrum of 2-(4-methoxybenzylidene) malononitrile . Reaction was performed with lanthanum hydroxide prepared by urea as fuel.

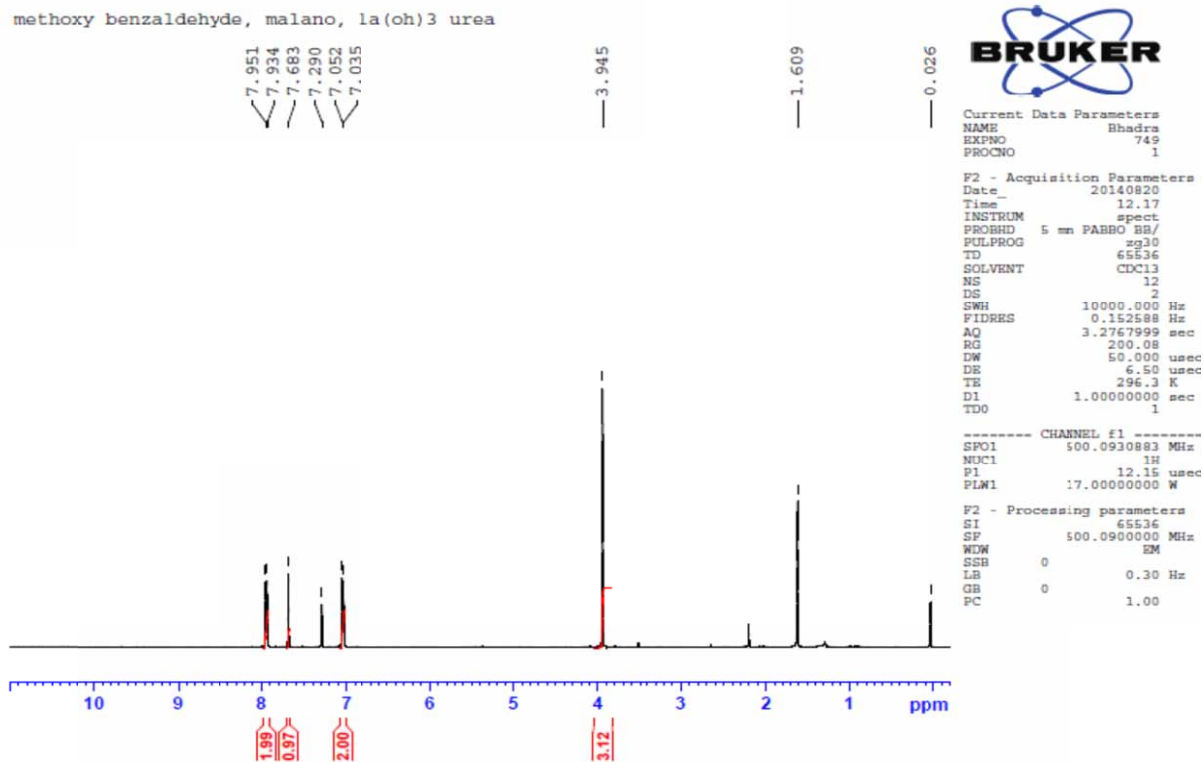

methoxy benzaldehyde, malano, 1a(oh)3 urea

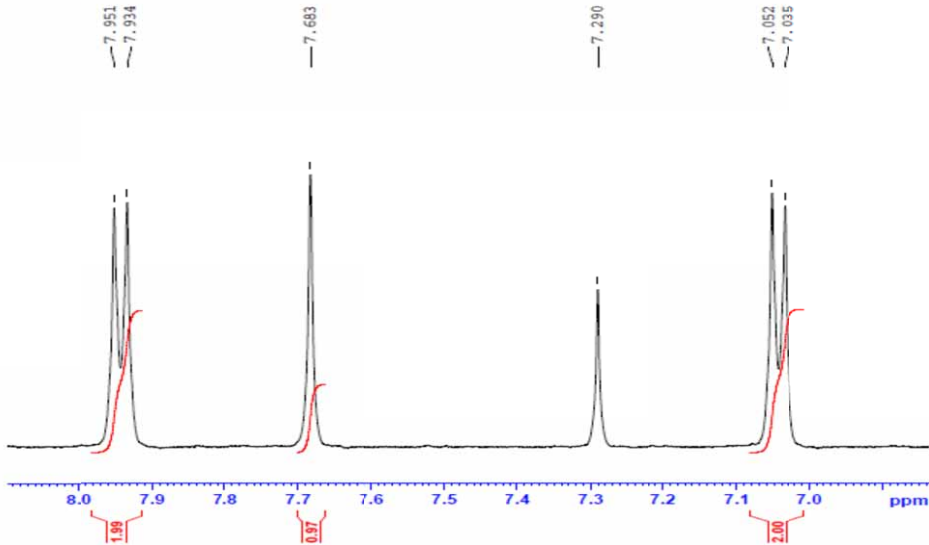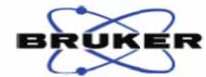

```
Current Data Parameters
NAME      Bhadra
EXPNO    749
PROCNO   1

F2 - Acquisition Parameters
Date_    20140820
Time     12.17
INSTRUM spect
PROBHD   5 mm PABBO BB/
PULPROG zg30
TD       65536
SOLVENT  CDCl3
NS       2
DS       2
SWH      10000.000 Hz
FIDRES   0.152588 Hz
AQ       3.2767999 sec
RG       200.08
DW       50.000 usec
DE       6.50 usec
TE       296.2 K
D1       1.00000000 sec
TDO      1

----- CHANNEL f1 -----
SFO1    500.0930883 MHz
NUC1     1H
P1       12.15 usec
PLW1    17.00000000 W

F2 - Processing parameters
SI       65536
SF       500.0900000 MHz
WDW      EM
SSB      0
LB       0.30 Hz
GB       0
PC       1.00
```

<sup>1</sup>H NMR Spectrum of 2-(4-methoxybenzylidene) malononitrile. Reaction was done using glycine as fuel.

methoxy, malano, glycine as fuel

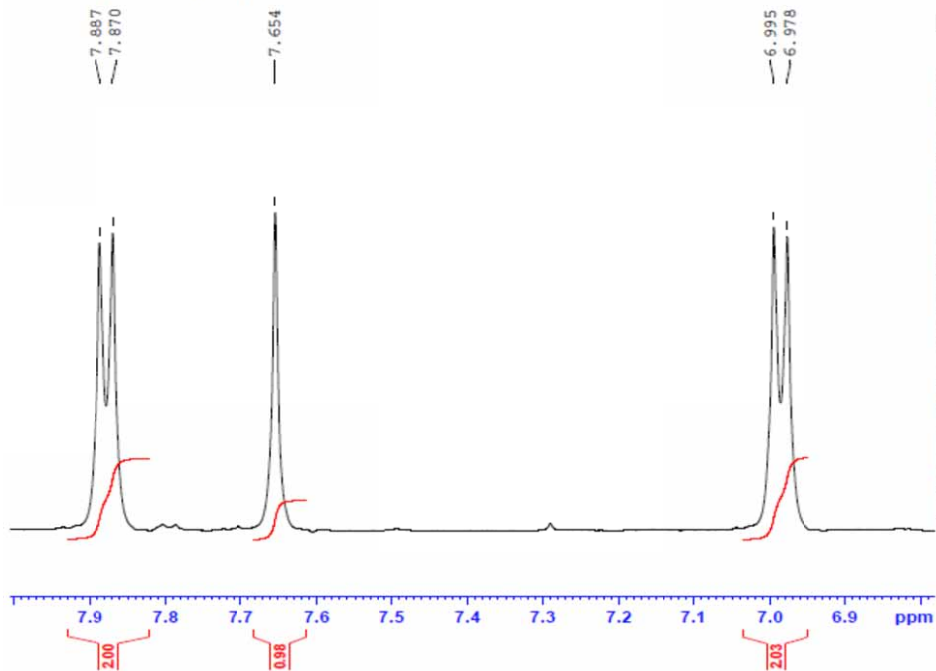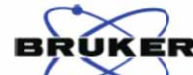

```
Current Data Parameters
NAME      Bhadra
EXPNO    542
PROCNO   1

F2 - Acquisition Parameters
Date_    20140811
Time     19.19
INSTRUM spect
PROBHD   5 mm PABBO BB/
PULPROG zg30
TD       65536
SOLVENT  CDCl3
NS       2
DS       2
SWH      10000.000 Hz
FIDRES   0.152588 Hz
AQ       3.2767999 sec
RG       32.16
DW       50.000 usec
DE       6.50 usec
TE       299.1 K
D1       1.00000000 sec
TDO      1

----- CHANNEL f1 -----
SFO1    500.0930883 MHz
NUC1     1H
P1       12.15 usec
PLW1    17.00000000 W

F2 - Processing parameters
SI       65536
SF       500.0900000 MHz
WDW      EM
SSB      0
LB       0.30 Hz
GB       0
PC       1.00
```



$^1\text{H}$  NMR Spectrum of 2-(4-methoxybenzylidene) malononitrile. Reaction was carried out using ODH as fuel

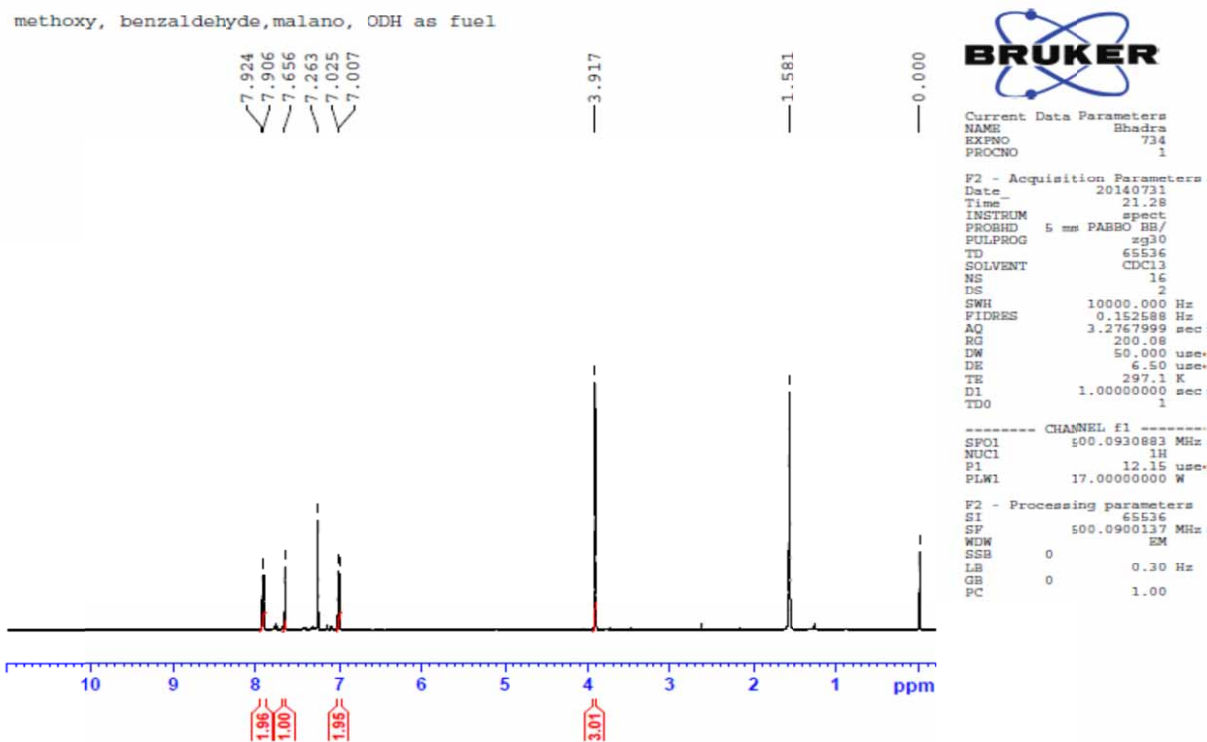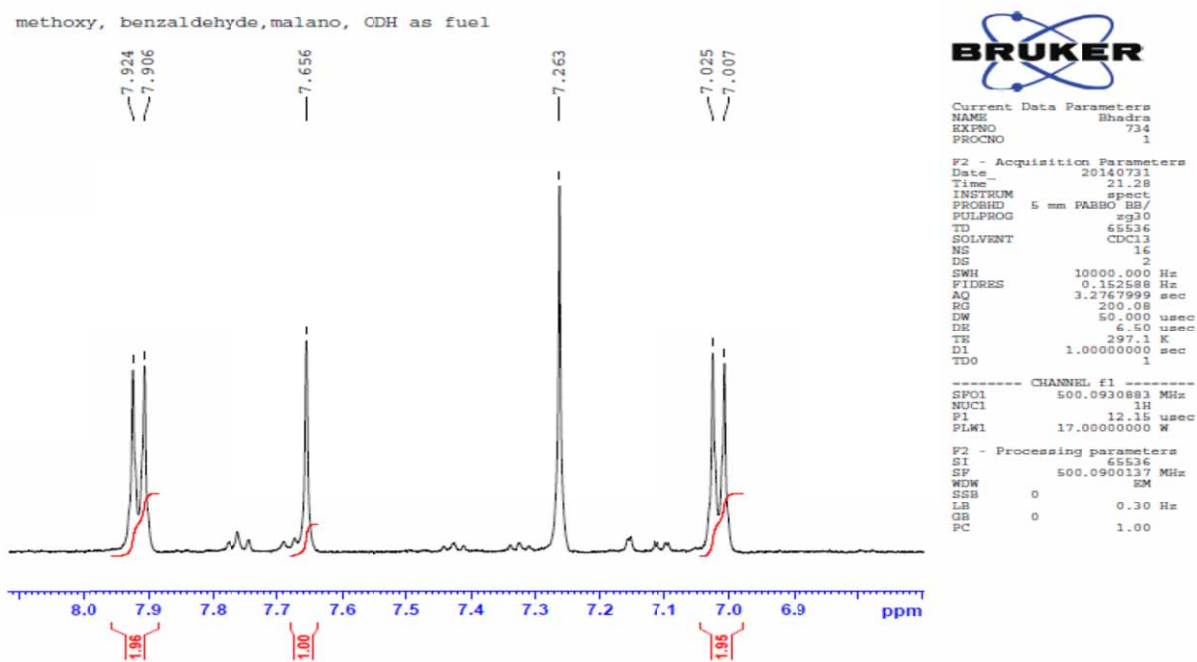

$^1\text{H}$  NMR Spectrum of 2-(4-methoxybenzylidene) malononitrile. Reaction was performed by using lanthanum Hydroxide (commercial).

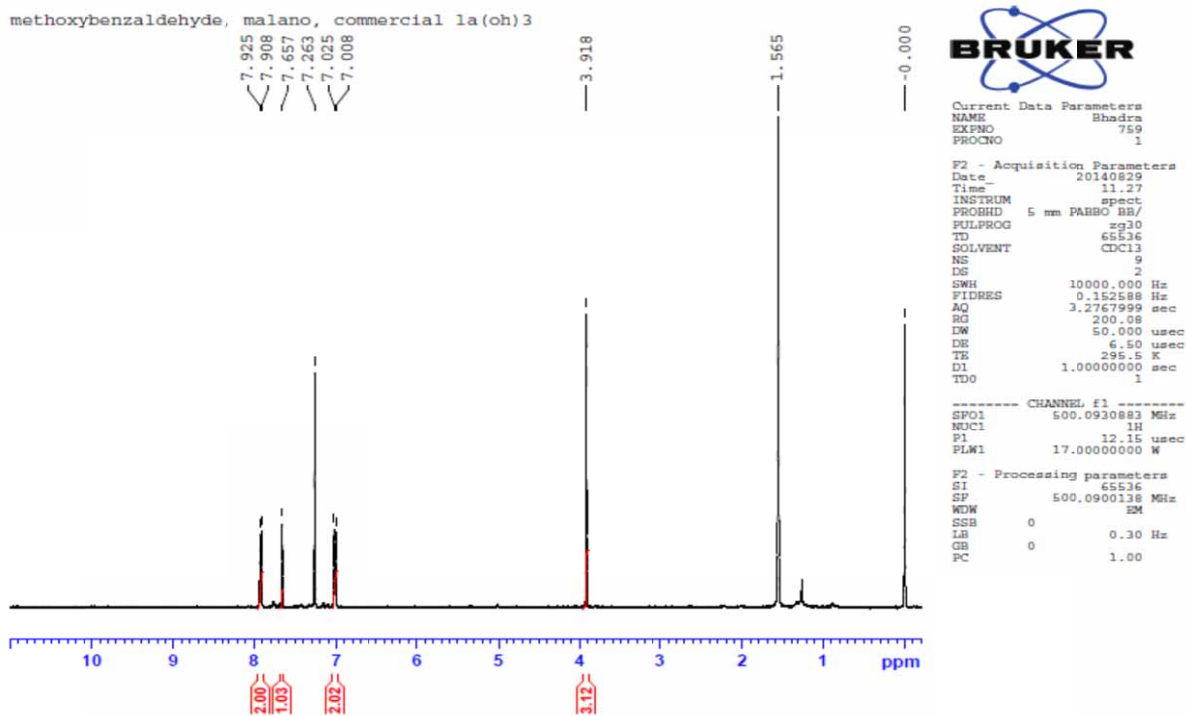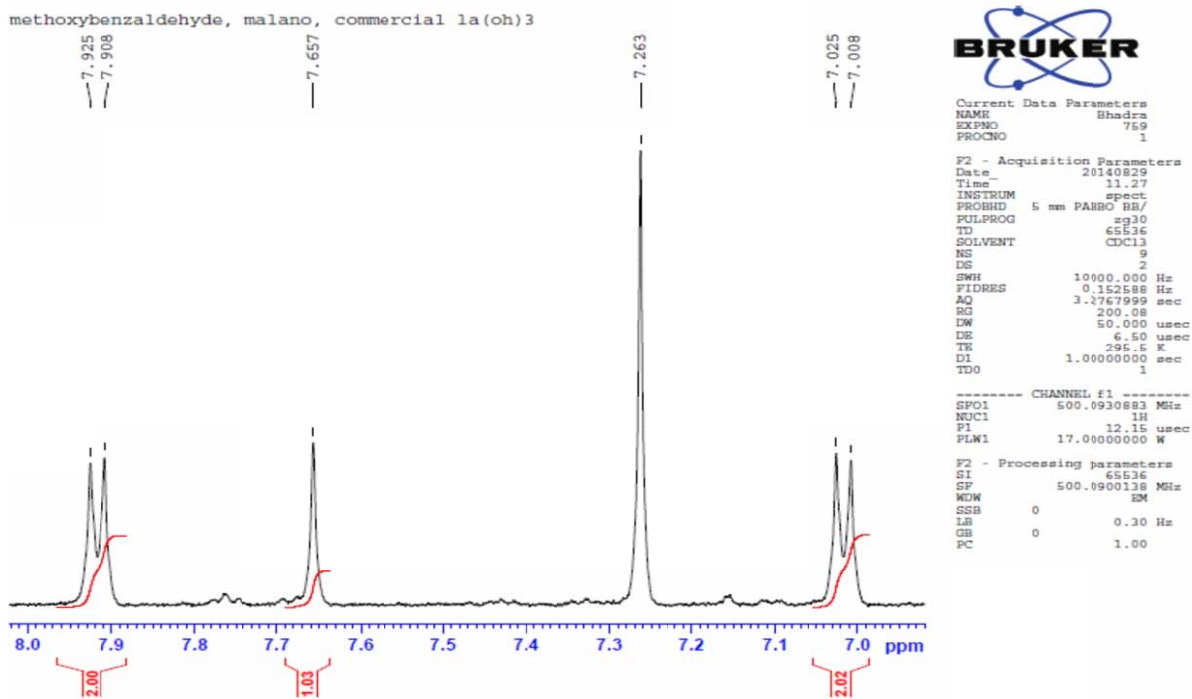

### <sup>13</sup>C NMR Spectrum of 2-(4-methoxybenzylidene)malononitrile

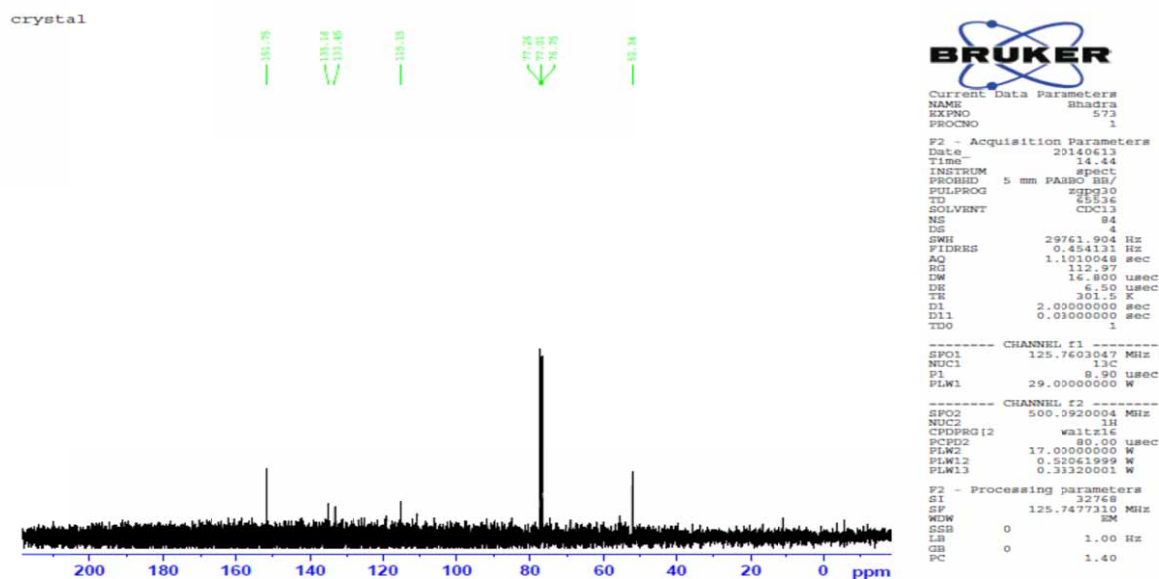

### <sup>1</sup>H NMR Spectrum of 2-(4-Fluorophenylmethylidene) malononitrile (1d)

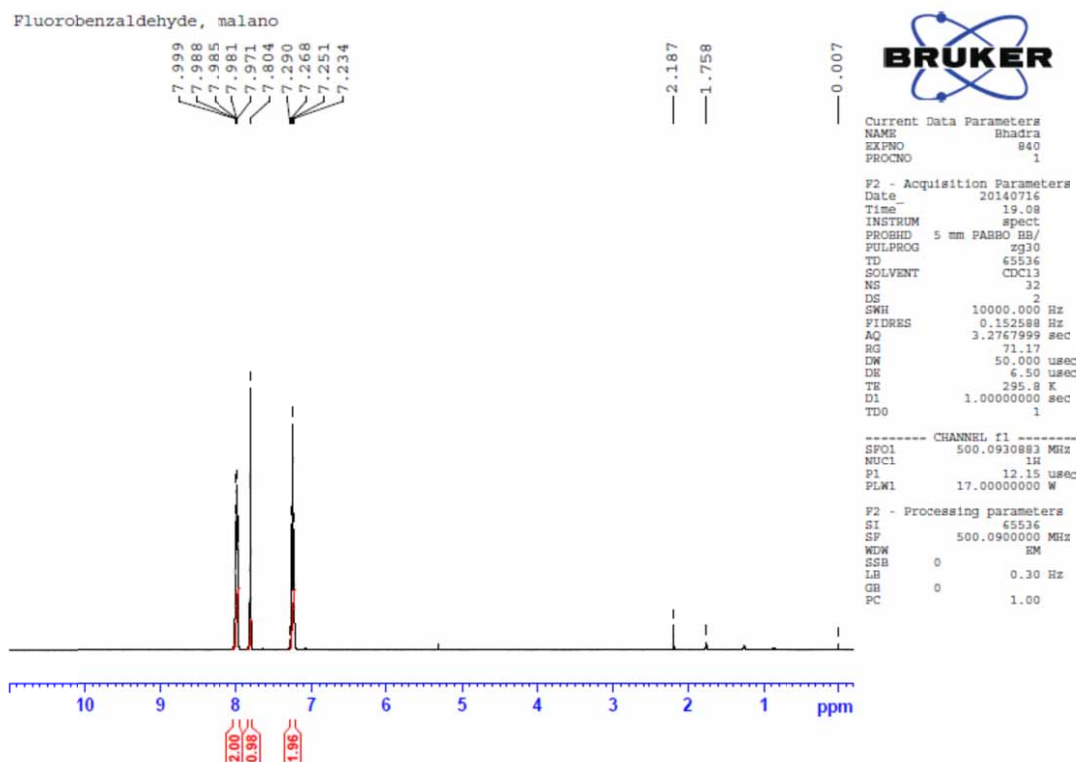

Fluorobenzaldehyde, malano

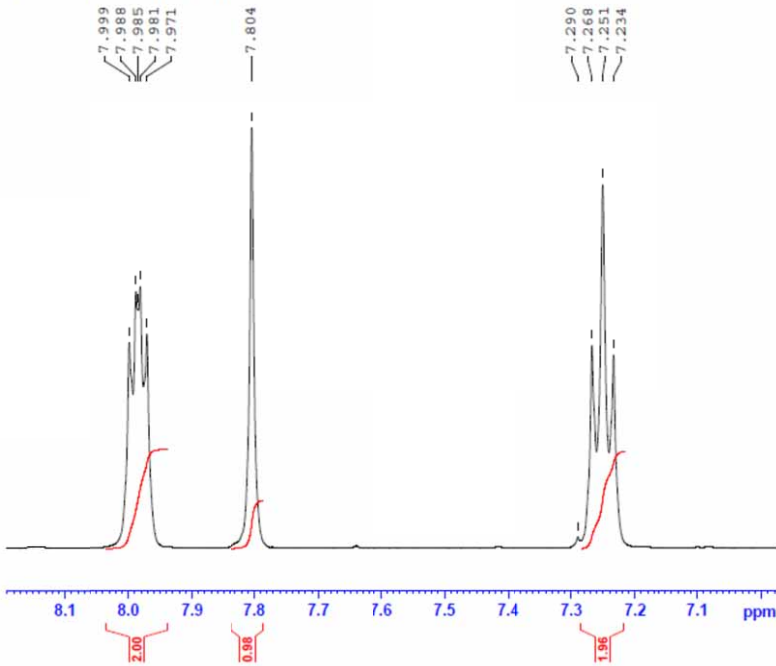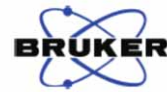

```
Current Data Parameters
NAME          Bhadra
EXPNO        840
PROCNO       1

F2 - Acquisition Parameters
Date_         20140716
Time_        19.08
INSTRUM      spect
PROBHD       5 mm PABBO BB/
PULPROG      zg30
TD           65536
SOLVENT      CDCl3
NS           32
DS           2
SWH          10000.000 Hz
FIDRES       0.152588 Hz
AQ           3.2767999 sec
RG           71.17
DW           50.000 usec
DE           6.50 usec
TE           295.8 K
D1           1.00000000 sec
TD0          1

----- CHANNEL f1 -----
SFO1         500.0930883 MHz
NUC1         1H
P1           12.15 usec
PLW1         17.00000000 W

F2 - Processing parameters
SI           65536
SF           500.0900000 MHz
WDW          EM
SSB          0
GB           0
PC           1.00
```

### <sup>13</sup>C Spectra of 2-(4-Fluorophenylmethylidene) malononitrile(1d)

Fluorobenzaldehyde, malanonitrile

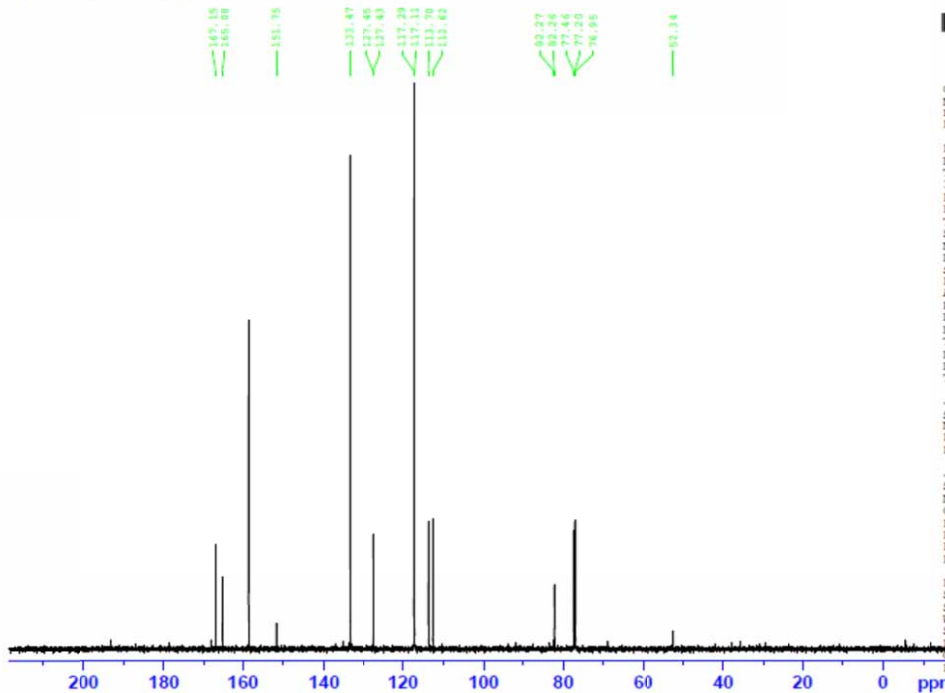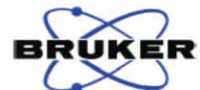

```
Current Data Parameters
NAME          Bhadra
EXPNO        841
PROCNO       1

F2 - Acquisition Parameters
Date_         20140716
Time_        19.18
INSTRUM      spect
PROBHD       5 mm PABBO BB/
PULPROG      zgpg30
TD           65536
SOLVENT      CDCl3
NS           186
DS           4
SWH          29761.904 Hz
FIDRES       0.454131 Hz
AQ           1.1010048 sec
RG           112.97
DW           16.800 usec
DE           6.50 usec
TE           297.2 K
D1           2.00000000 sec
D11          0.03000000 sec
TD0          1

----- CHANNEL f1 -----
SFO1         125.7603047 MHz
NUC1         13C
P1           8.90 usec
PLW1         29.00000000 W

----- CHANNEL f2 -----
SFO2         500.0920004 MHz
NUC2         1H
CPDPRG[2]    waltz16
PCPD2        80.00 usec
PLW2         17.00000000 W
PLW12        0.52061999 W
PLW13        0.33320001 W

F2 - Processing parameters
SI           32768
SF           125.7477310 MHz
WDW          EM
SSB          0
GB           0
PC           1.40
```

<sup>1</sup>H NMR Spectrum of 2-(furan-2-ylmethylene) malononitrile (1e)

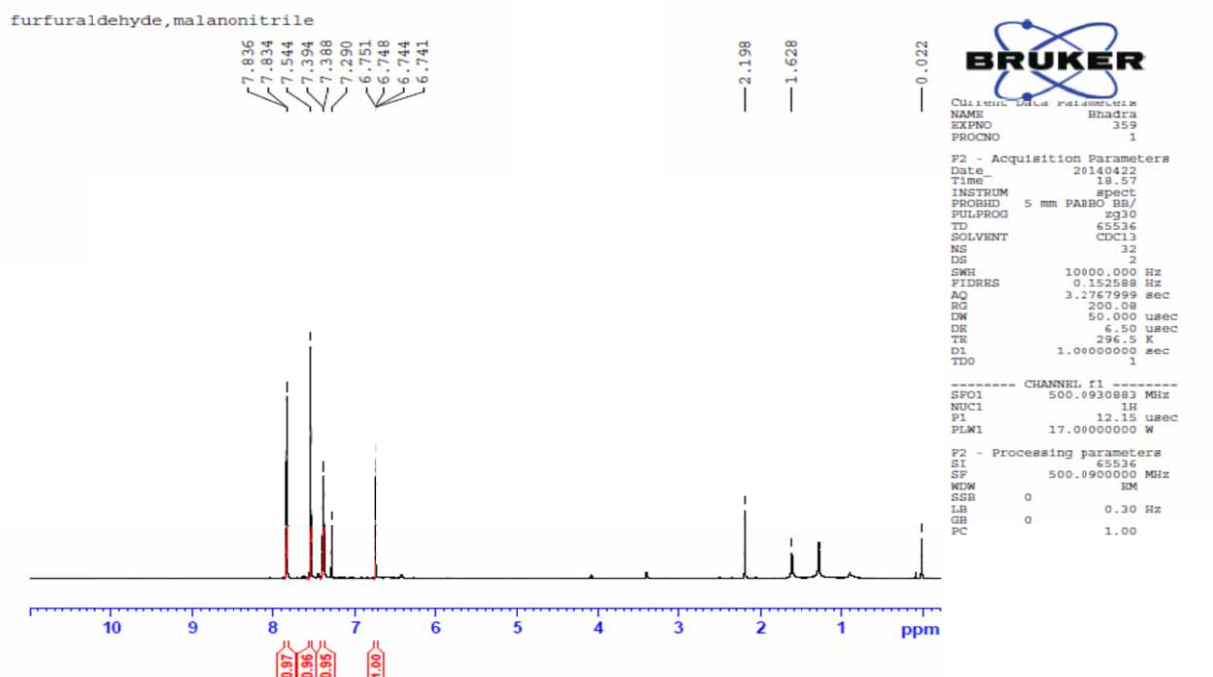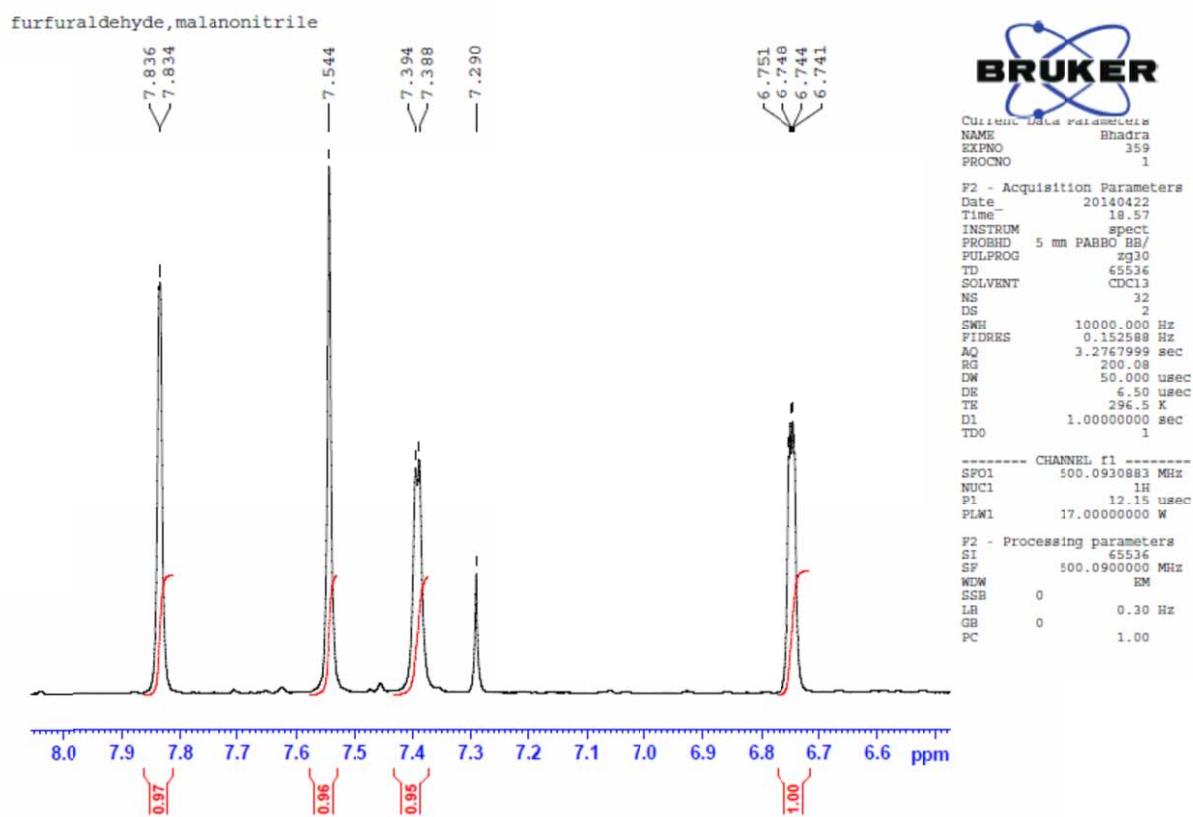

<sup>13</sup>C NMR Spectrum of 2-(furan-2-ylmethylene)malononitrile

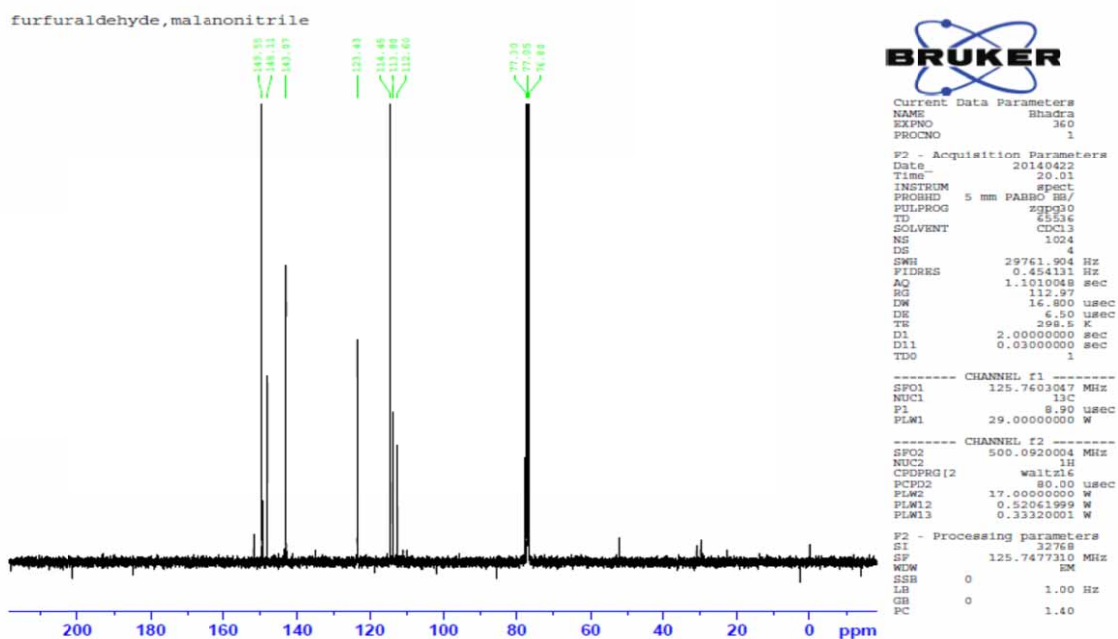

<sup>1</sup>H NMR Spectrum of 2-(naphthalene-1-ylmethylene) malononitrile (1f)

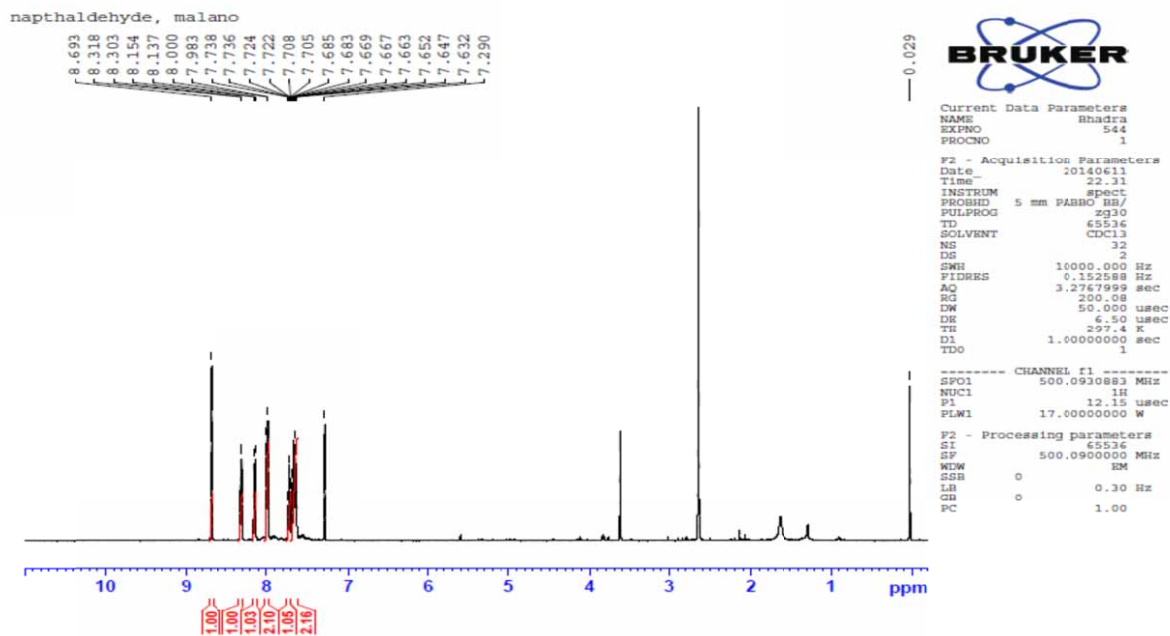

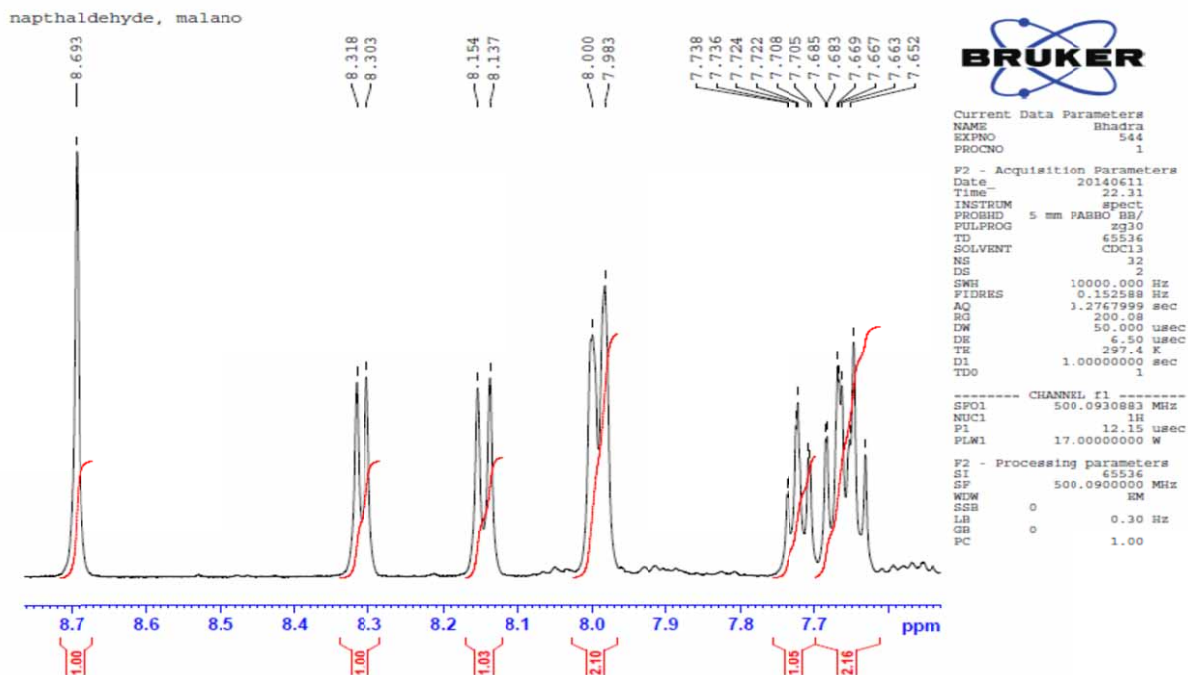

<sup>13</sup>C NMR Spectrum of 2-(naphthalene-1-ylmethylene)malononitrile

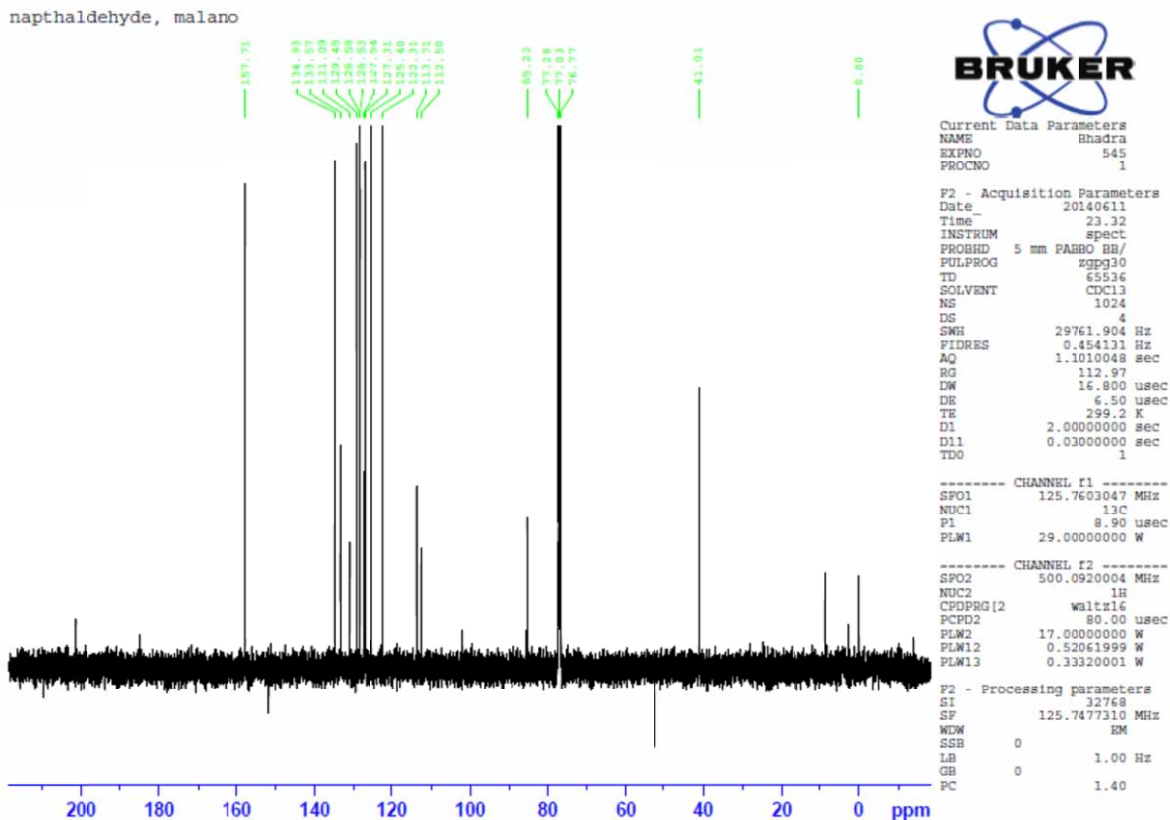

<sup>1</sup>H NMR Spectrum of (2Z,4E)-2,5-diphenylpenta-2,4-dienitrile(1g)

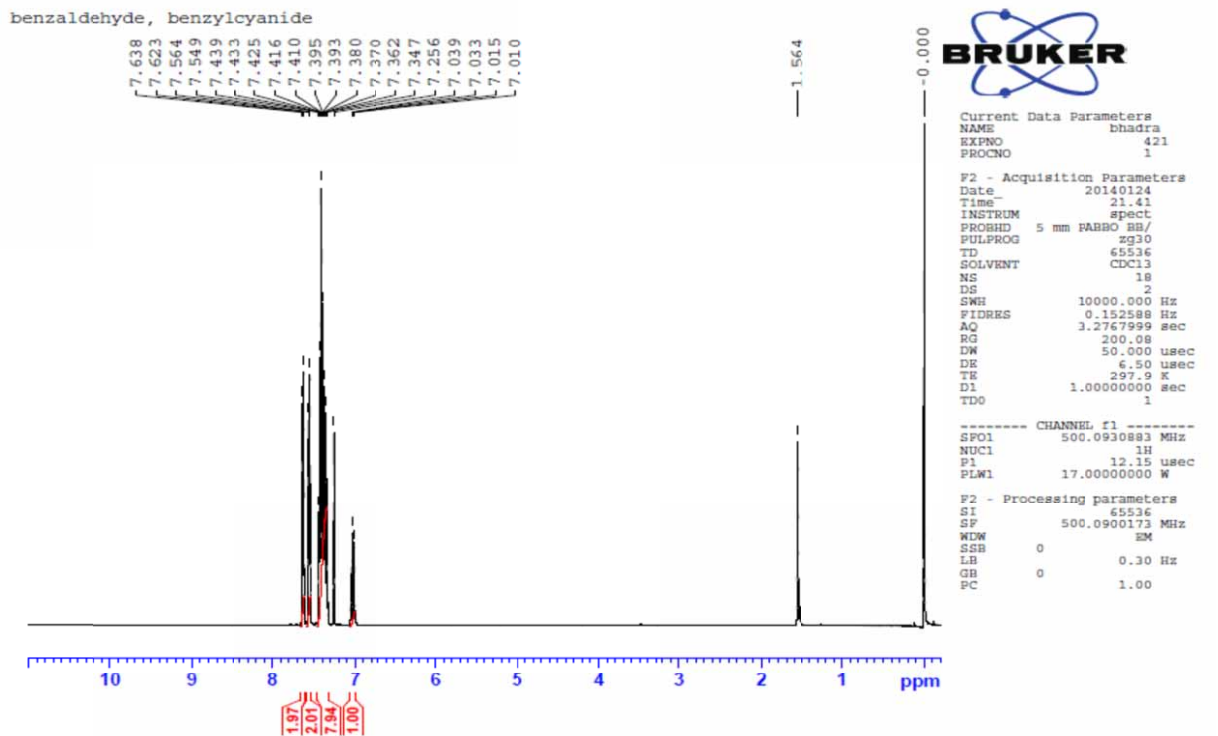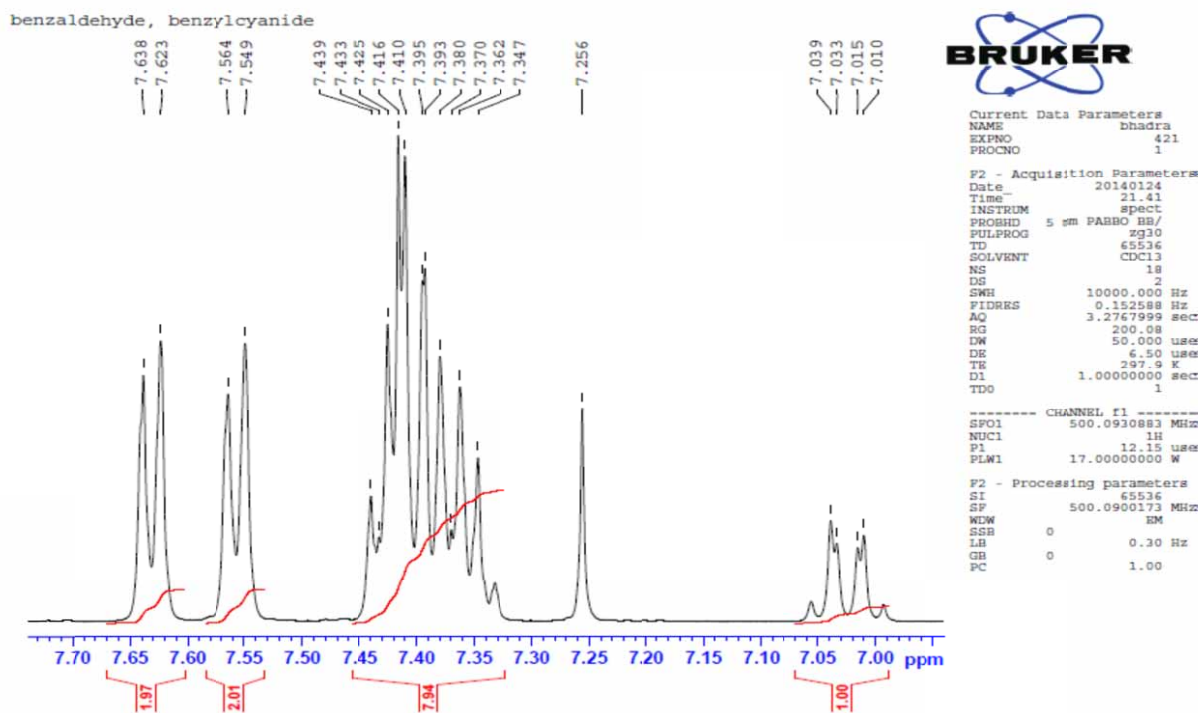



<sup>1</sup>H NMR Spectrum of (Z)-2,3-diphenylacrylonitrile (1h)

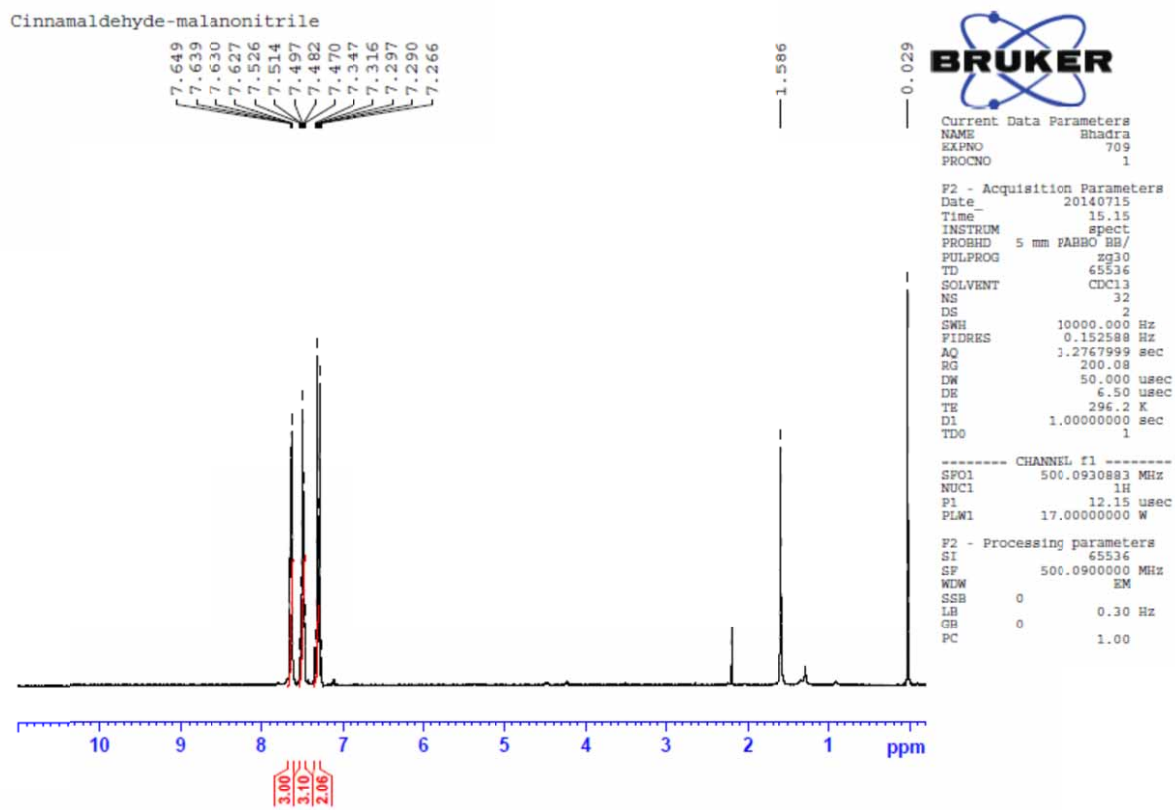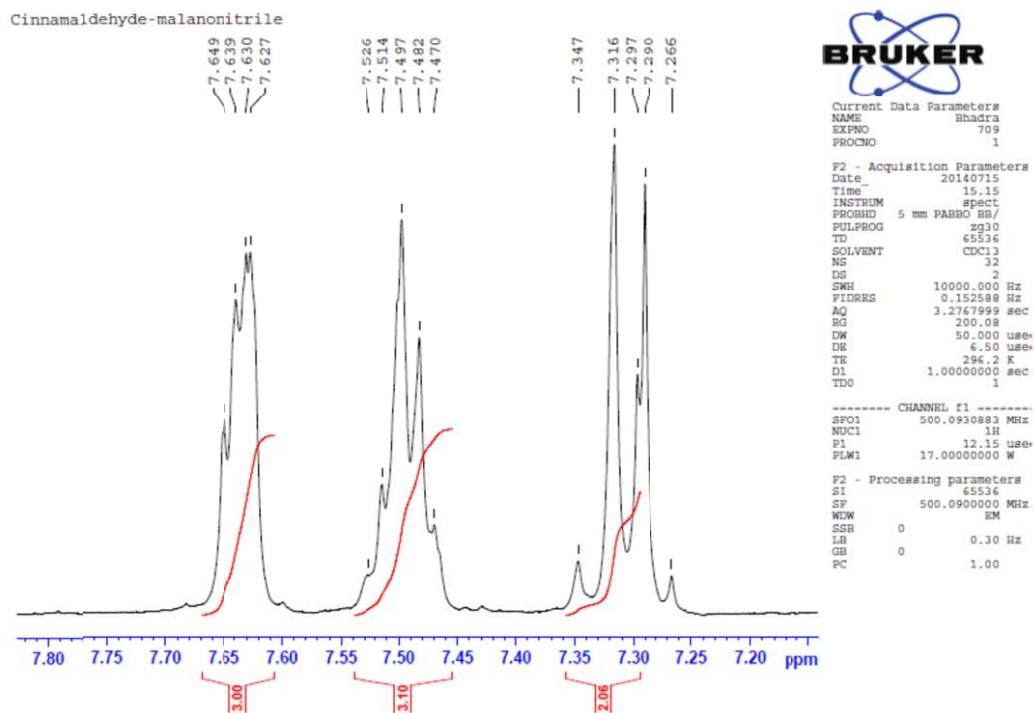

### <sup>13</sup>C Spectra of (Z)-2,3-diphenylacrylonitrile (1h)

cinnamal, malano

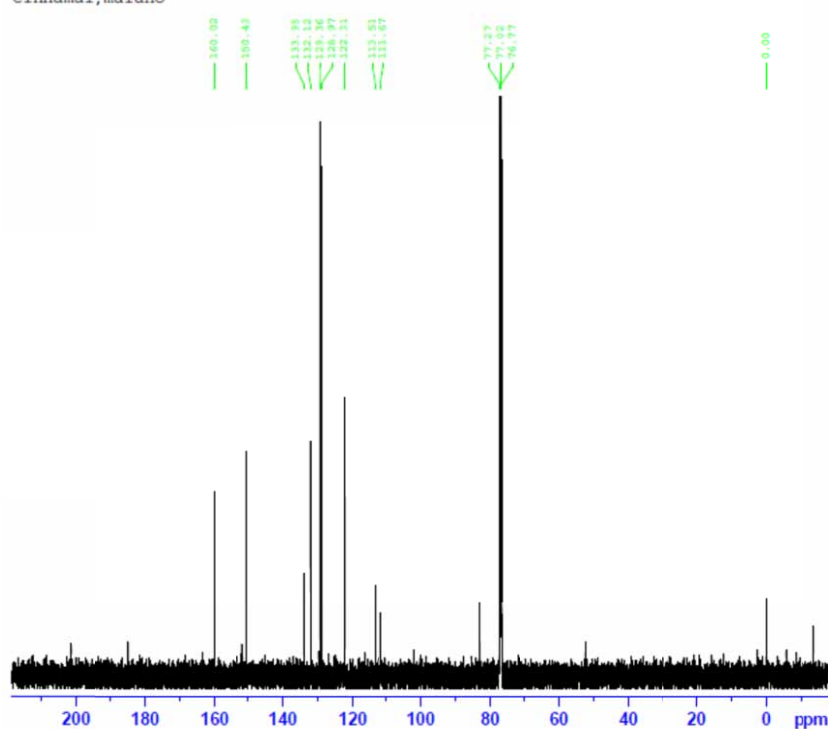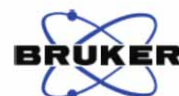

Current Data Parameters  
 NAME Rhadra  
 EXPNO 785  
 PROCNO 1

F2 - Acquisition Parameters  
 Date 20140715  
 Time 16.14  
 INSTRUM spect  
 PROBHD 5 mm PABBO BB/  
 PULPROG zgpg30  
 TD 65536  
 SOLVENT CDCl3  
 NS 1024  
 DS 4  
 SWH 29761.904 Hz  
 FIDRES 0.454131 Hz  
 AQ 1.1010048 sec  
 RG 112.97  
 DW 16.800 usec  
 DE 6.50 usec  
 TE 298.2 K  
 D1 2.0000000 sec  
 D11 0.0300000 sec  
 TDO 1

----- CHANNEL f1 -----  
 SFO1 125.7603047 MHz  
 NUC1 13C  
 P1 8.90 usec  
 PLW1 29.0000000 W

----- CHANNEL f2 -----  
 SFO2 500.0920004 MHz  
 NUC2 1H  
 CPDPRG2 waltz16  
 PCPD2 80.00 usec  
 PLW2 17.0000000 W  
 PLW12 0.52061999 W  
 PLW13 0.33320001 W

F2 - Processing parameters  
 SI 32768  
 SF 125.7477310 MHz  
 WDW EM  
 SSB 0  
 LB 1.00 Hz  
 GB 0  
 PC 1.40

### Mass spectrum of (2Z,4E)-5-(4-methoxyphenyl)-2-phenylpenta-2,4-dienenitrile (1i)

Exact mass: 261.12

Mass obtained in the positive mode: 262.1576

Elemental composition: C<sub>18</sub>H<sub>15</sub>NO

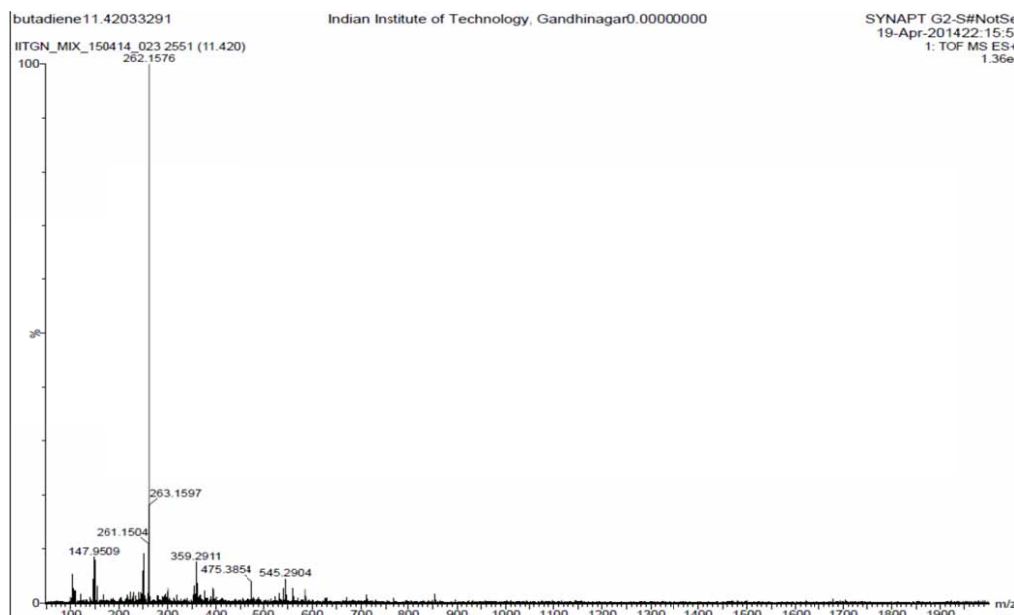

<sup>1</sup>H NMR Spectrum of (2Z,4E)-5-(4-methoxyphenyl)-2-phenylpenta-2,4-dienitrile

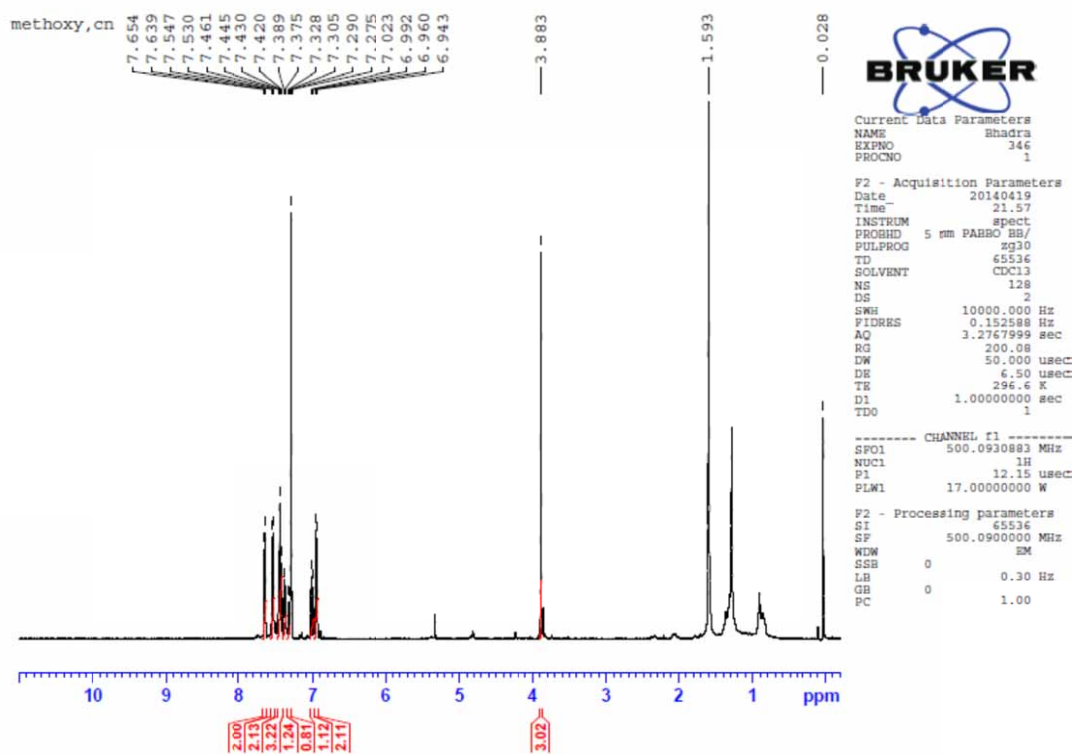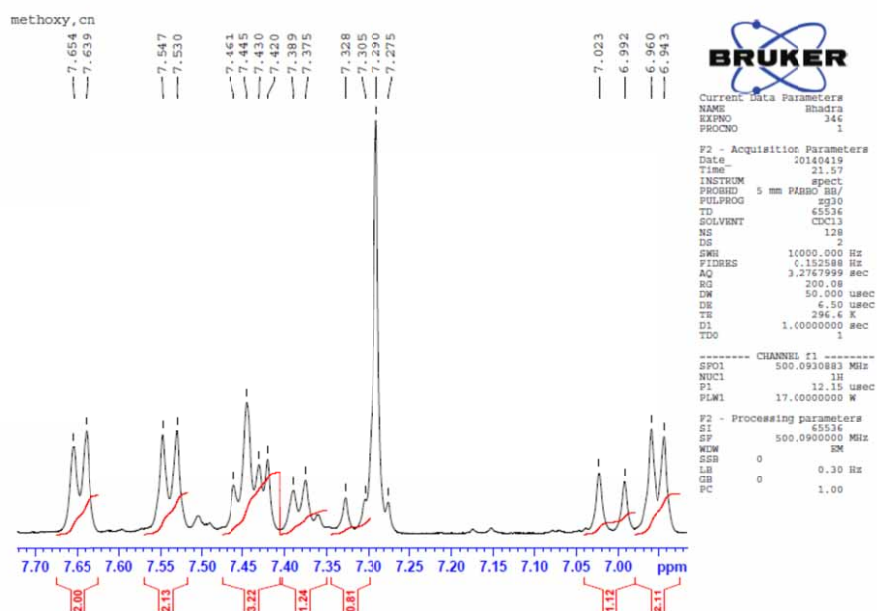

<sup>13</sup>C NMR Spectrum of (2Z,4E)-5-(4-methoxyphenyl)-2-phenylpenta-2,4-dienitrile

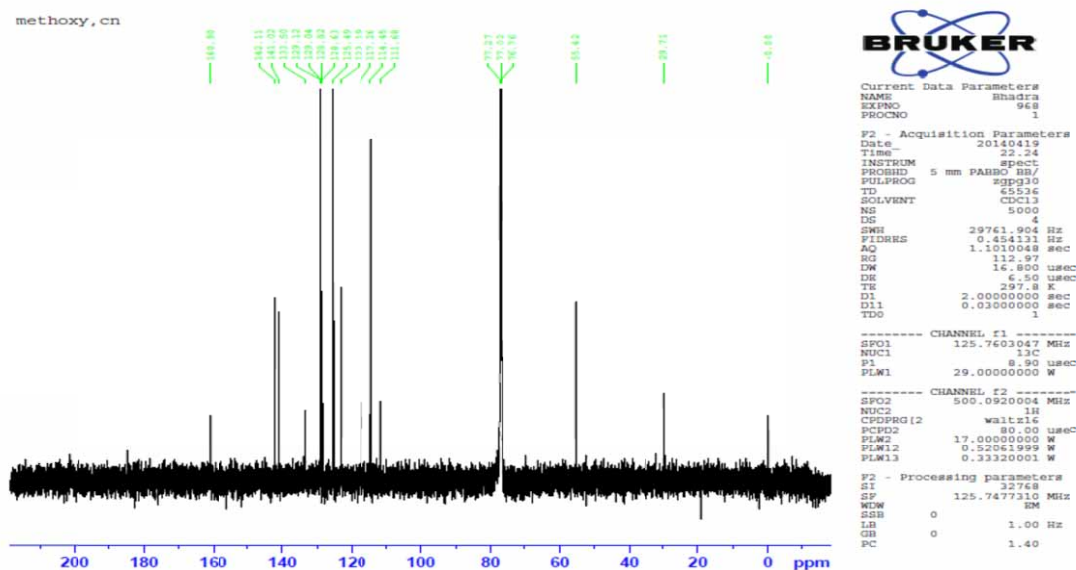

Hantzsch Reaction

Mass spectrum of diethyl 4-(4-bromophenyl)-2,6-dimethyl,4-dihydropyridine-3,5-dicarboxylate (2a)

Exact mass: 407.07

Mass obtained in the positive mode: 409.9511

Elemental composition: C<sub>19</sub>H<sub>22</sub>BrNO<sub>4</sub>

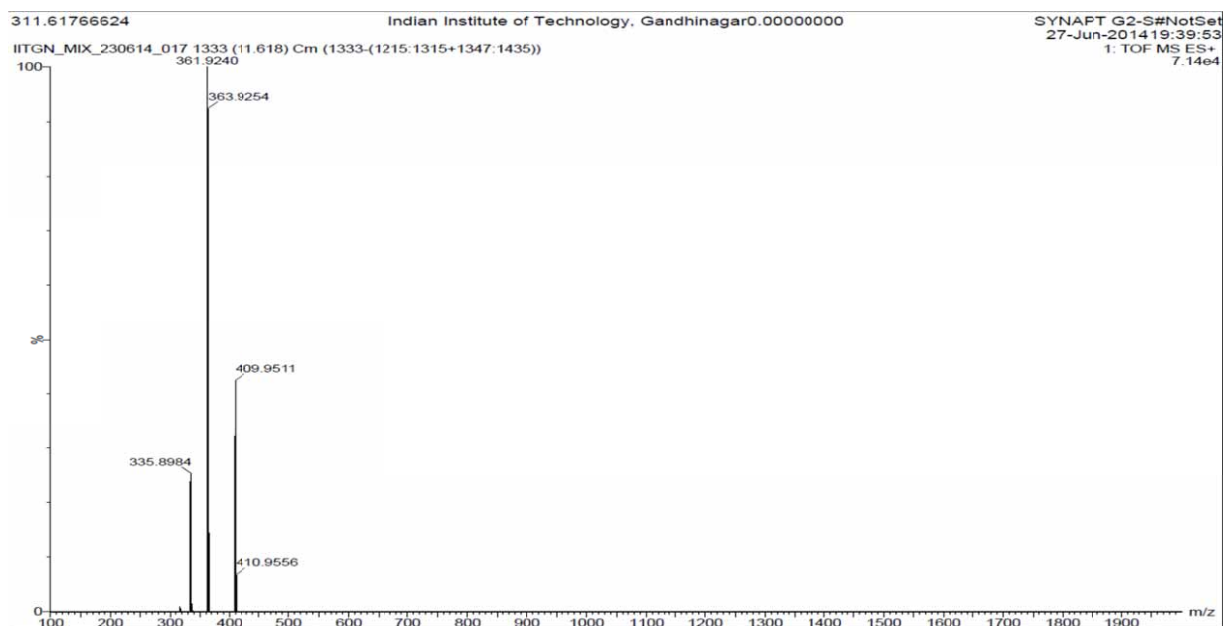

<sup>1</sup>H NMR Spectrum of diethyl 4-(4-bromophenyl)-2,6-dimethyl,4-dihydropyridine-3,5-dicarboxylate

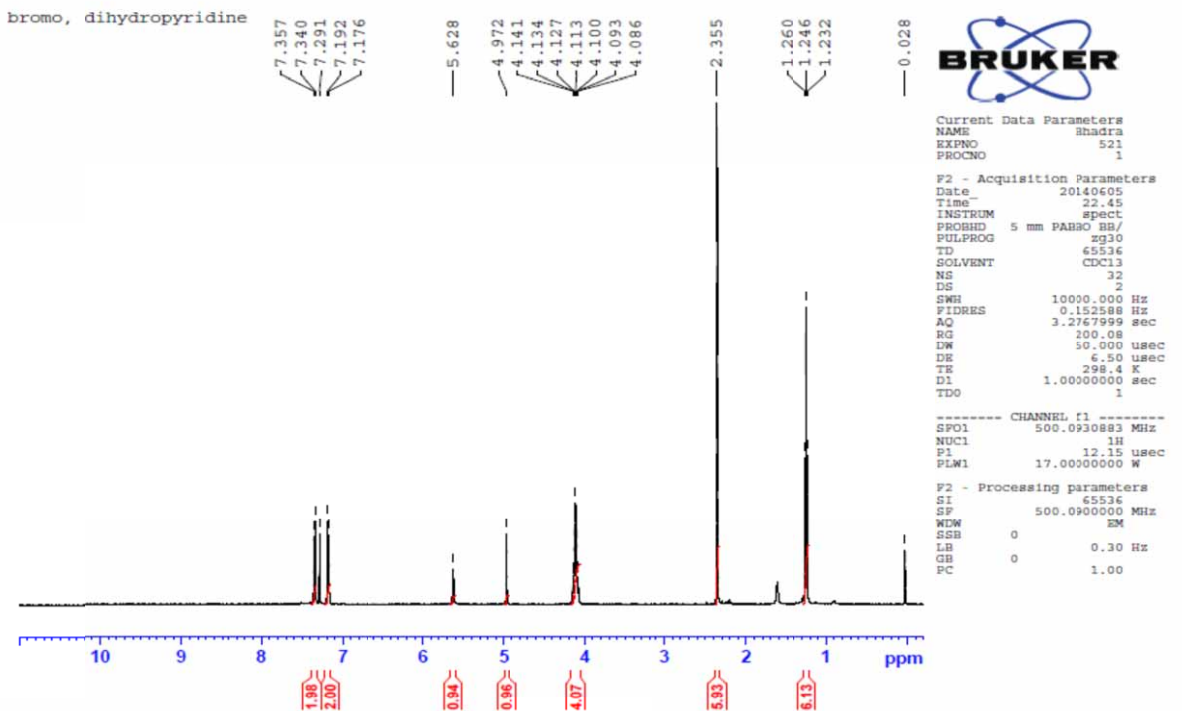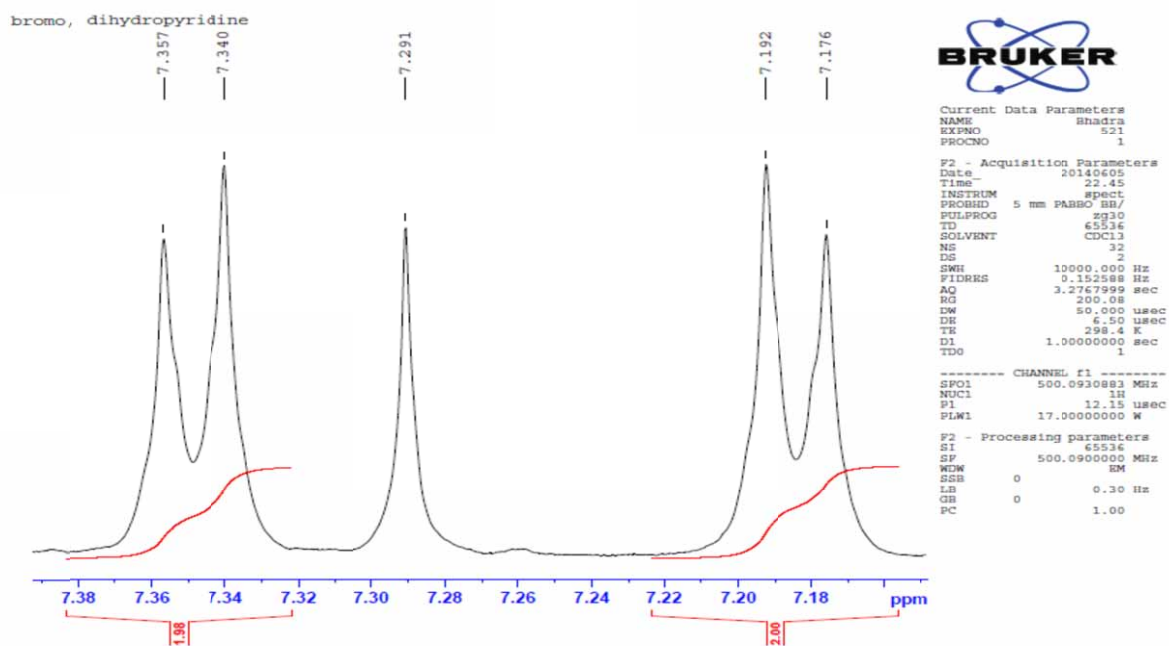

<sup>13</sup>C NMR Spectrum of diethyl 4-(4-bromophenyl)-2,6-dimethyl,4-dihydropyridine-3,5-dicarboxylate

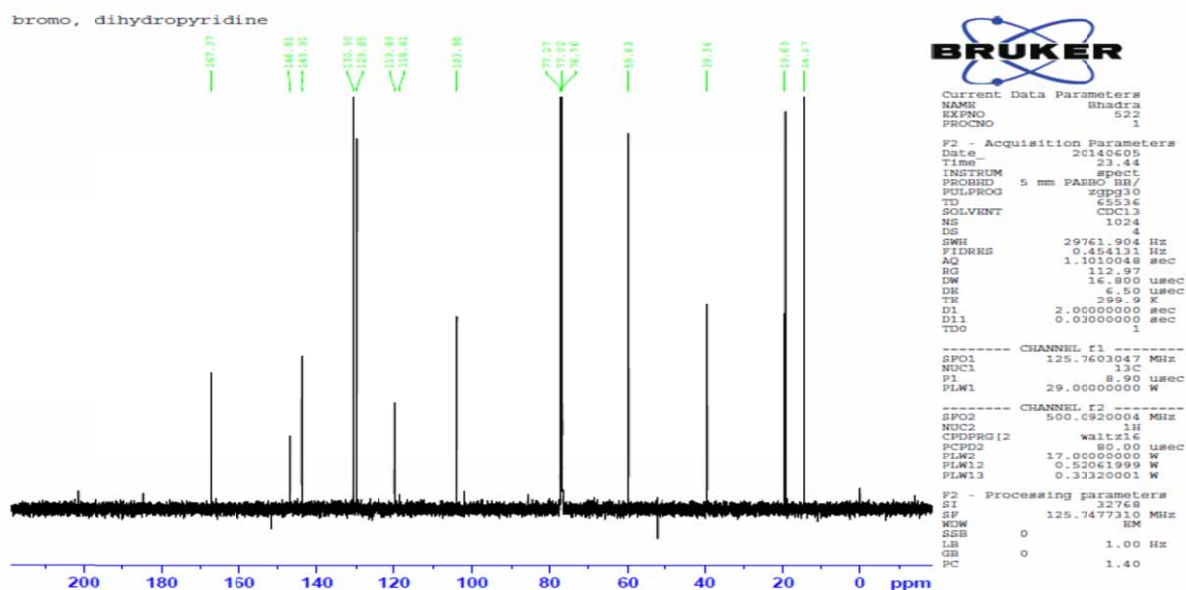

<sup>1</sup>H NMR Spectrum of diethyl 4-(4-methoxyphenyl)-2,6-dimethyl-1,4-dihydropyridine-3,5-dicarboxylate(2b)

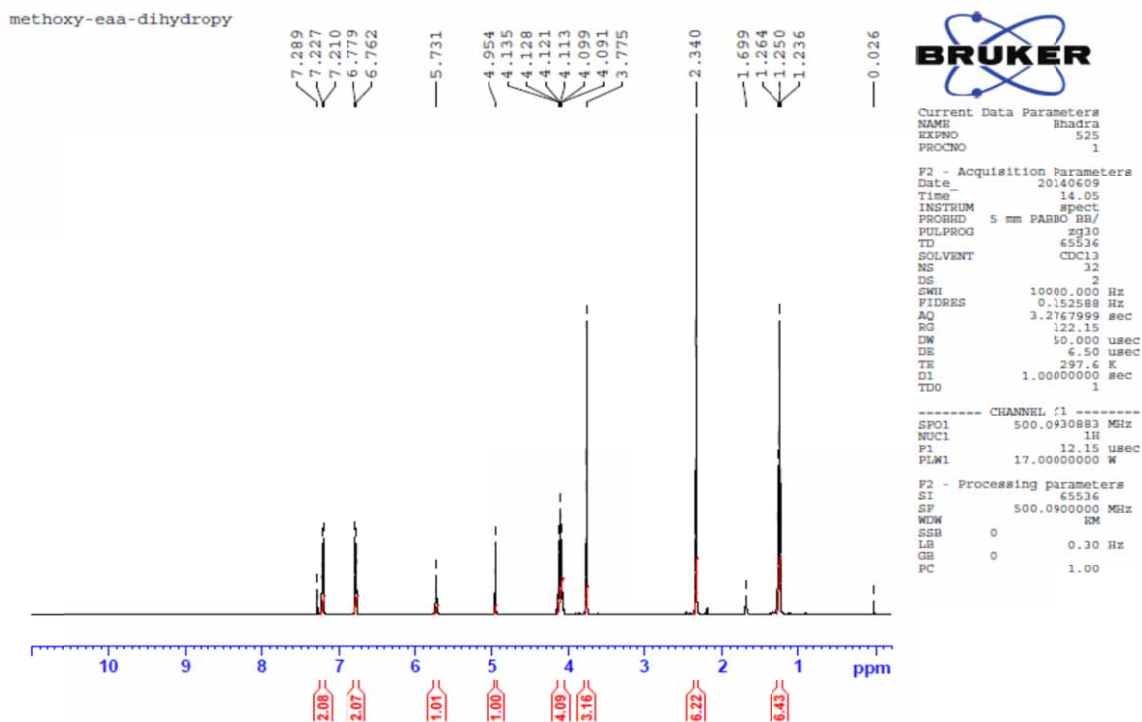

methoxy-eaa-dihydropy

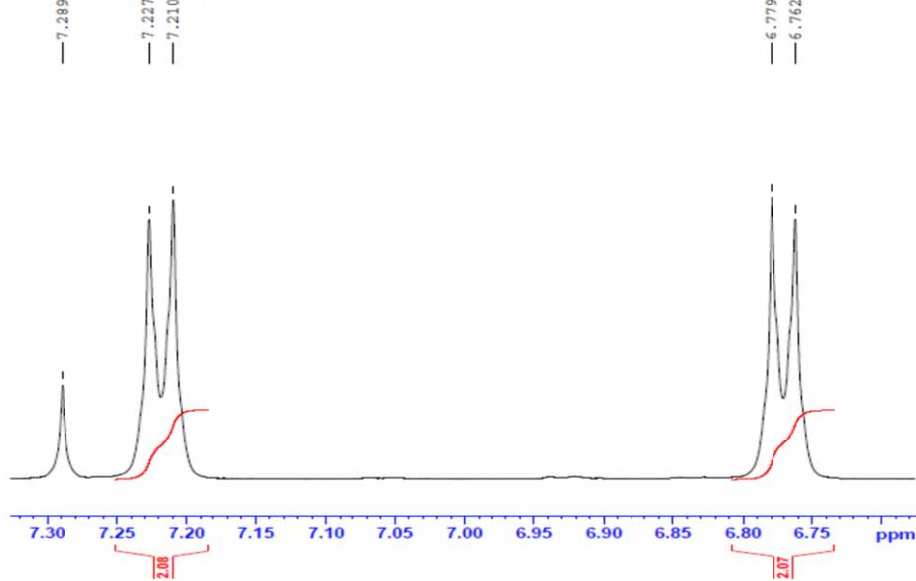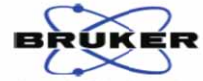

```
Current Data Parameters
NAME      Rhadra
EXPNO    525
PROCNO   1

F2 - Acquisition Parameters
Date_    20140609
Time     14.05
INSTRUM spect
PROBHD   5 mm PARBO BB/
PULPROG zg30
TD       65536
SOLVENT  CDCl3
NS       32
DS       4
SWH      10000.000 Hz
FIDRES   0.152588 Hz
AQ       3.2767999 sec
RG       122.15
DW       50.000 usec
DE       6.50 usec
TE       297.6 K
D1       1.00000000 sec
TDO      1

----- CHANNEL f1 -----
SFO1    500.0930883 MHz
NUC1    1H
P1      12.15 usec
PLW1    17.00000000 W

F2 - Processing parameters
SI      65536
SF      500.0900000 MHz
WDW     RM
SSB     0
LB      0.30 Hz
GB      0
PC      1.00
```

<sup>13</sup>C NMR Spectrum of diethyl 4-(4-methoxyphenyl)-2,6-dimethyl-1,4-dihydropyridine-3,5-dicarboxylate

methoxy-eaa-dihydropyridine

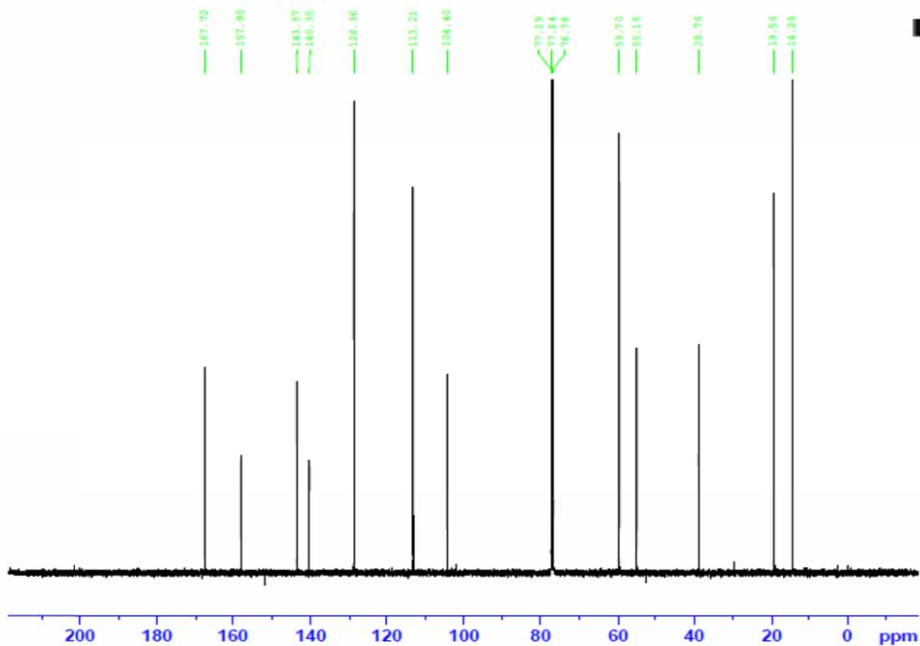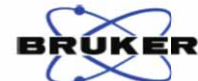

```
Current Data Parameters
NAME      Rhadra
EXPNO    528
PROCNO   1

F2 - Acquisition Parameters
Date_    20140609
Time     15.24
INSTRUM spect
PROBHD   5 mm PARBO BB/
PULPROG zgpg30
TD       65536
SOLVENT  CDCl3
NS       1024
DS       4
SWH      29761.904 Hz
FIDRES   0.454131 Hz
AQ       1.1010048 sec
RG       112.97
DW       16.800 usec
DE       6.50 usec
TE       300.5 K
D1       2.00000000 sec
D11      0.030000000 sec
TDO      1

----- CHANNEL f1 -----
SFO1    125.7603047 MHz
NUC1    13C
P1      8.90 usec
PLW1    29.00000000 W

----- CHANNEL f2 -----
SFO2    500.0920004 MHz
NUC2    1H
CPDPRG12 waltz16
PCPD2   80.00 usec
PLW2    17.00000000 W
PLW12   0.52061999 W
PLW13   0.33320001 W

F2 - Processing parameters
SI      32768
SF      125.7477310 MHz
WDW     RM
SSB     0
LB      1.00 Hz
GB      0
PC      1.40
```

Mass spectrum of diethyl 2, 6-dimethyl-4-(naphthalene-1-yl)-1,4-dihydropyridine-3,5-dicarboxylate (2c)

Exact mass: 379.18

Mass obtained in the positive mode: 382.165

Elemental composition: C<sub>23</sub>H<sub>25</sub>NO<sub>4</sub>

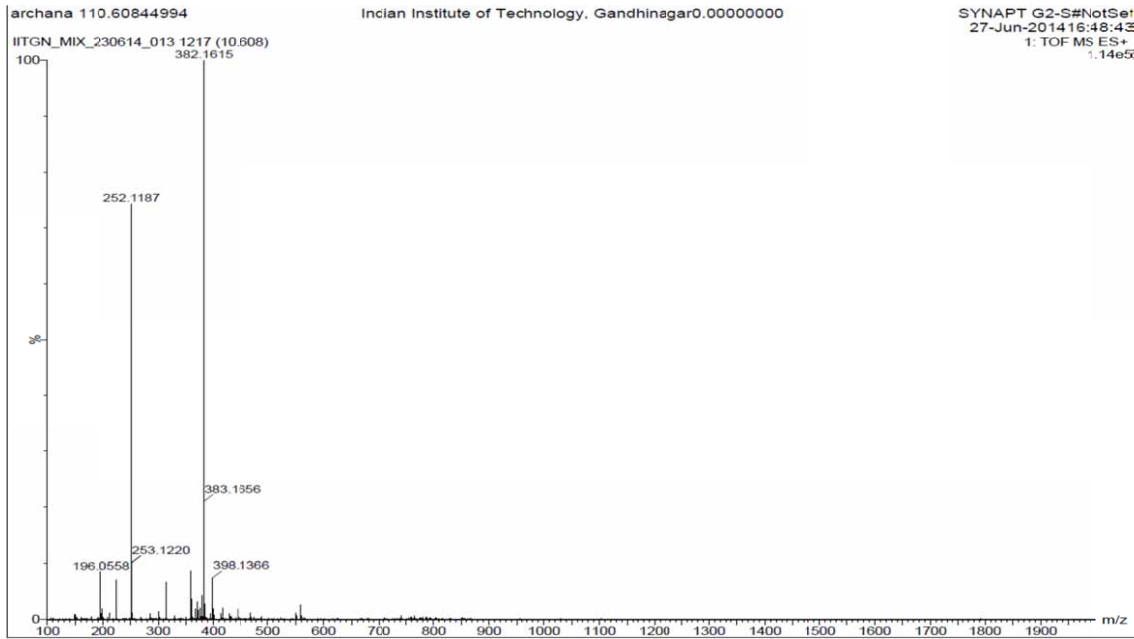

<sup>1</sup>H NMR Spectrum of diethyl 2,6-dimethyl-4-(naphthalene-1-yl)-1,4-dihydropyridine-3,5-dicarboxylate

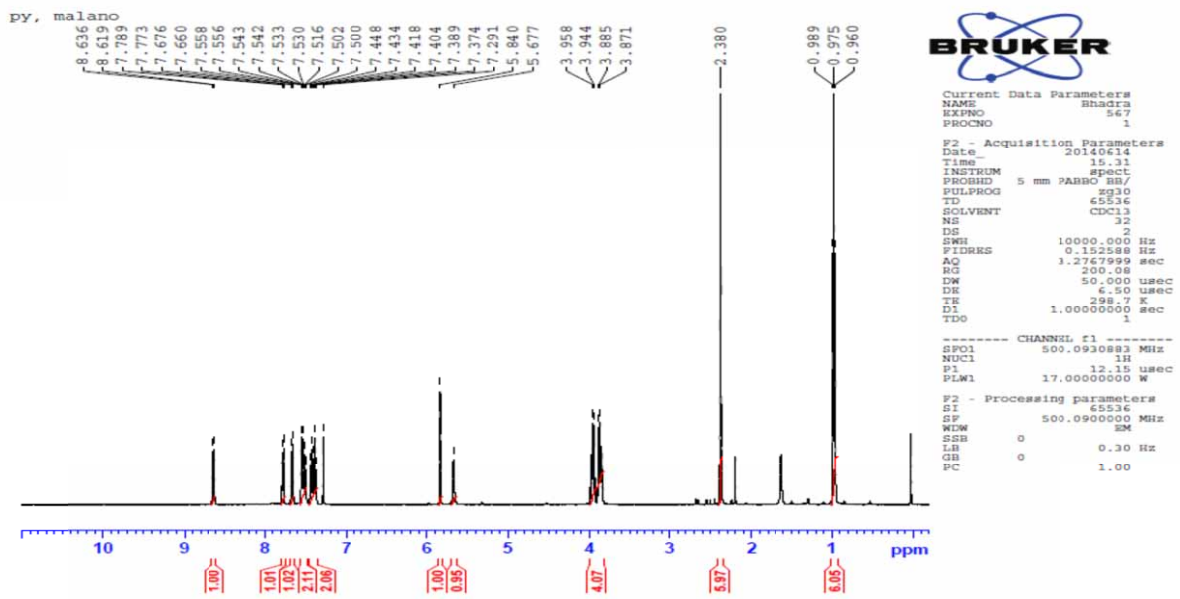



py, malano

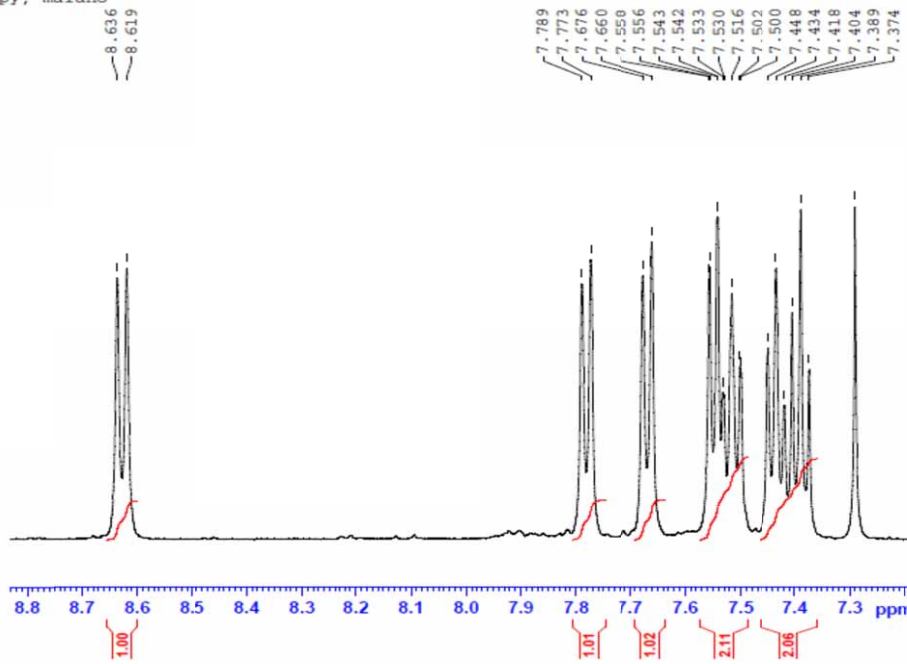

7.789  
7.773  
7.676  
7.660  
7.558  
7.556  
7.543  
7.542  
7.533  
7.530  
7.516  
7.502  
7.500  
7.448  
7.434  
7.418  
7.404  
7.389  
7.374

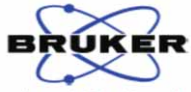

Current Data Parameters  
 NAME Bhadra  
 EXPNO 567  
 PROCNO 1

F2 - Acquisition Parameters  
 Date\_ 20140614  
 Time 15.31  
 INSTRUM spect  
 PROBHD 5 mm PABBO BB/  
 PULPROG zg30  
 TD 65536  
 SOLVENT CDCl3  
 NS 32  
 DS 2  
 SWH 10000.000 Hz  
 FIDRES 0.152588 Hz  
 AQ 1.2767999 sec  
 RG 200.08  
 DW 50.000 usec  
 DE 6.50 usec  
 TE 298.7 K  
 D1 1.00000000 sec  
 TDO 1

----- CHANNEL f1 -----  
 SFO1 500.0930883 MHz  
 NUC1 1H  
 P1 12.15 usec  
 PLW1 17.00000000 W

F2 - Processing parameters  
 SI 65536  
 SF 500.0900000 MHz  
 WDW EM  
 SSB 0  
 LB 0.30 Hz  
 GB 0  
 PC 1.00

<sup>13</sup>C NMR Spectrum of diethyl 2, 6-dimethyl-4-(naphthalene-1-yl)-1,4-dihydropyridine-3,5-dicarboxylate

naphthal, hantzsch

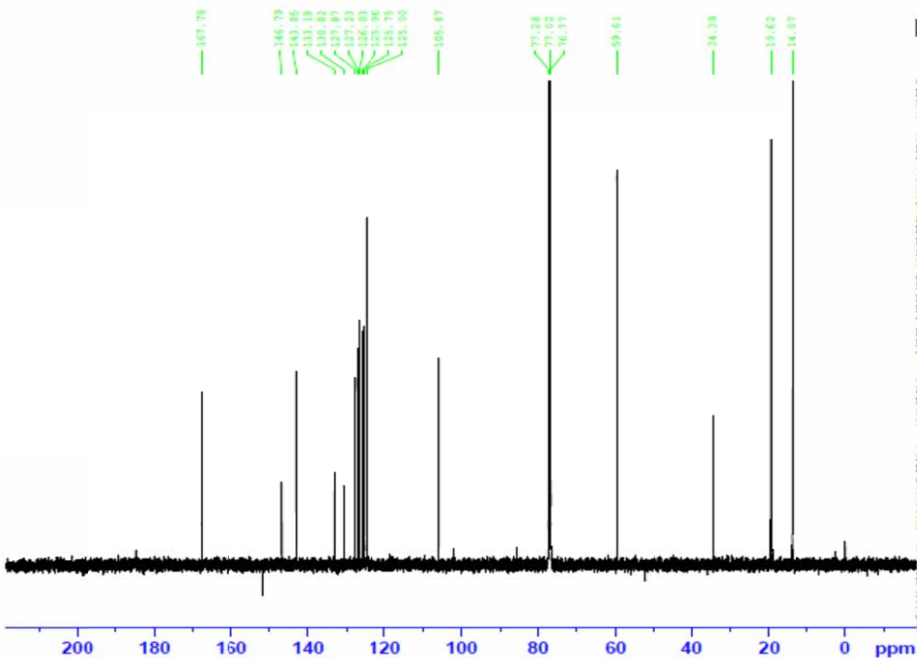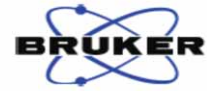

Current Data Parameters  
 NAME Bhadra  
 EXPNO 568  
 PROCNO 1

F2 - Acquisition Parameters  
 Date\_ 20140614  
 Time 15.29  
 INSTRUM spect  
 PROBHD 5 mm PABBO BB/  
 PULPROG zgpg30  
 TD 65536  
 SOLVENT CDCl3  
 NS 1024  
 DS 4  
 SWH 29761.904 Hz  
 FIDRES 0.454131 Hz  
 AQ 1.1010048 sec  
 RG 112.97  
 DW 16.800 usec  
 DE 6.50 usec  
 TE 301.2 K  
 D1 2.00000000 sec  
 D11 0.03000000 sec  
 TDO 1

----- CHANNEL f1 -----  
 SFO1 125.7603047 MHz  
 NUC1 13C  
 P1 8.90 usec  
 PLW1 29.00000000 W

----- CHANNEL f2 -----  
 SFO2 500.0920004 MHz  
 NUC2 1H  
 CPDPRG2 waltz16  
 PCPD2 80.00 usec  
 PLW2 17.00000000 W  
 PLW12 0.52061999 W  
 PLW13 0.33320001 W

F2 - Processing parameters  
 SI 32768  
 SF 125.7477310 MHz  
 WDW EM  
 SSB 0  
 LB 1.00 Hz  
 GB 0  
 PC 1.40

<sup>1</sup>H NMR Spectrum of diethyl 2,6-dimethyl-4-(4-nitrophenyl)-1,4-dihydropyridine-3,5-dicarboxylate (2d)

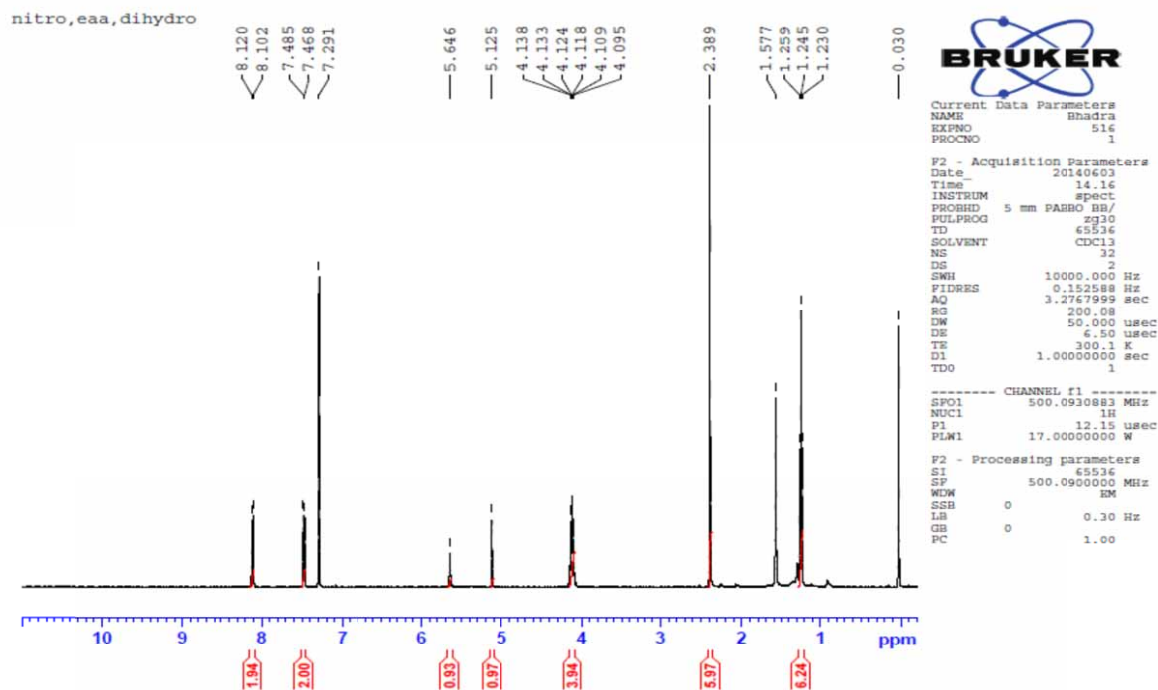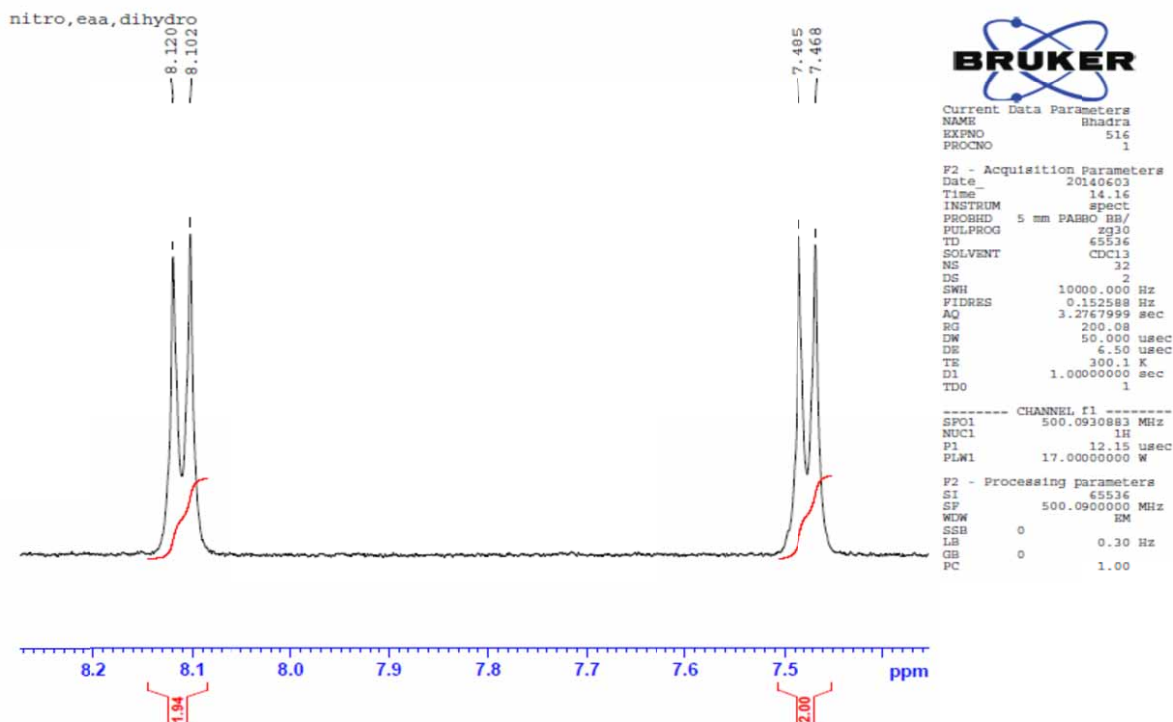

<sup>13</sup>C NMR Spectrum of diethyl 2, 6-dimethyl-4-(4-nitrophenyl)-1,4-dihydropyridine-3,5-dicarboxylate

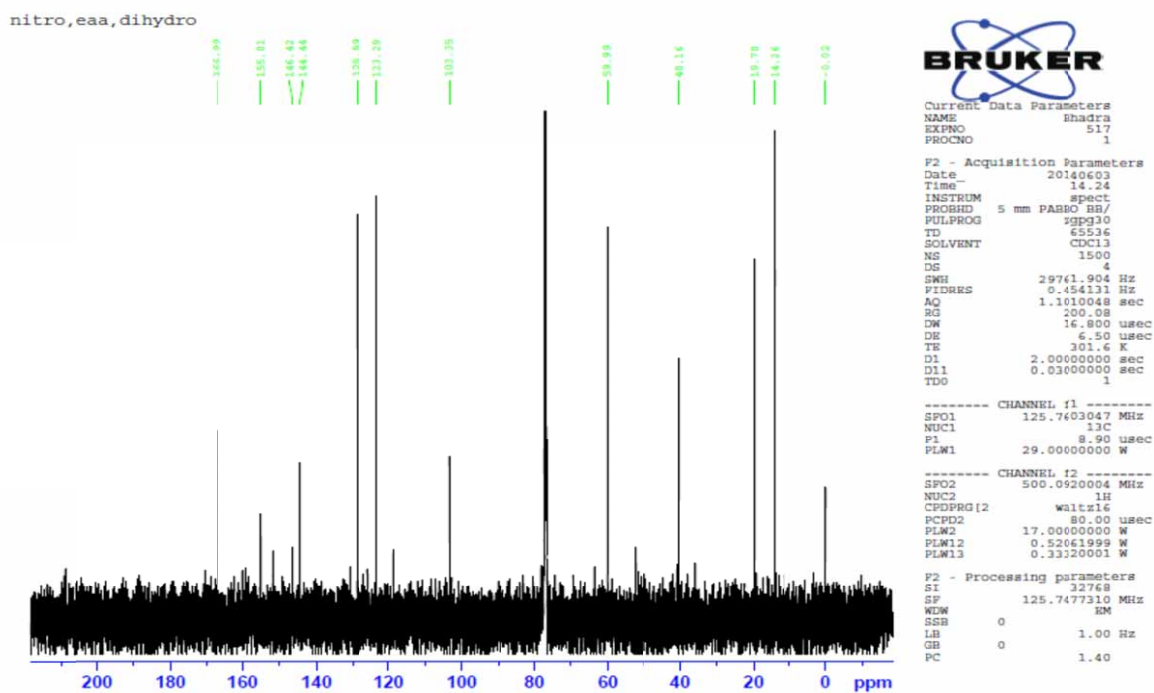

<sup>1</sup>H NMR Spectrum of diethyl 2,6-dimethyl-4-(thiophen-2-yl)-1,4-dihydropyridine-3,5-dicarboxylate (2e)

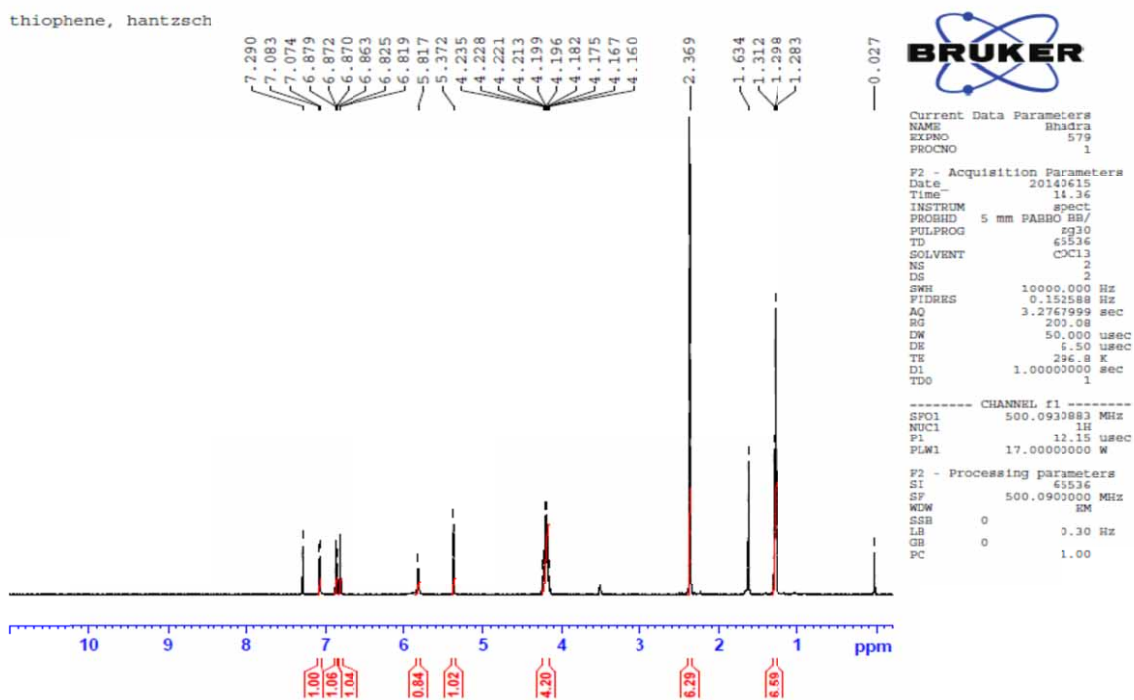

thiophene, hantzsch

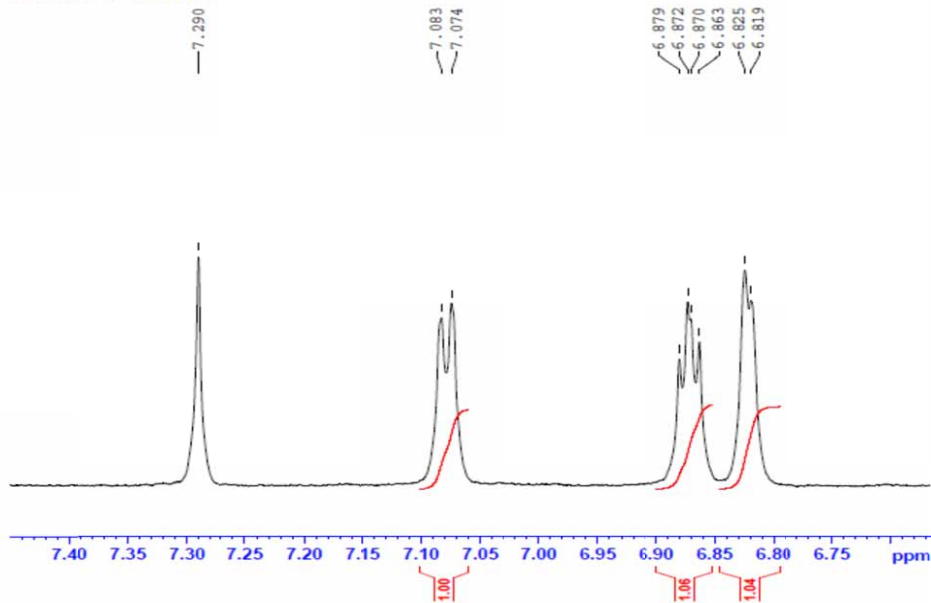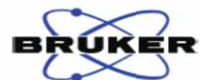

```
Current Data Parameters
NAME      Bhadra
EXPNO    579
PROCNO   1

F2 - Acquisition Parameters
Date_    20140615
Time     14.36
INSTRUM spect
PROBHD   5 mm PABBO BB/
PULPROG zg30
TD       65536
SOLVENT  CDCl3
NS       2
DS       2
SWH      10000.000 Hz
FIDRES   0.152588 Hz
AQ       3.2767999 sec
RG       200.58
DW       50.000 usec
DE       6.50 usec
TE       296.8 K
D1       1.00000000 sec
TDO      1

----- CHANNEL f1 -----
SFO1    500.093083 MHz
NUC1     1H
P1       12.15 usec
PLW1     17.00000000 W

F2 - Processing parameters
SI       65536
SF       500.0900000 MHz
WDW      RM
SSB      0
LB       0.30 Hz
GB       0
PC       1.00
```

<sup>13</sup>C NMR Spectrum of diethyl 2,6-dimethyl-4-(thiophen-2-yl)-1,4-dihydropyridine-3,5-dicarboxylate

thiophene hantzsch

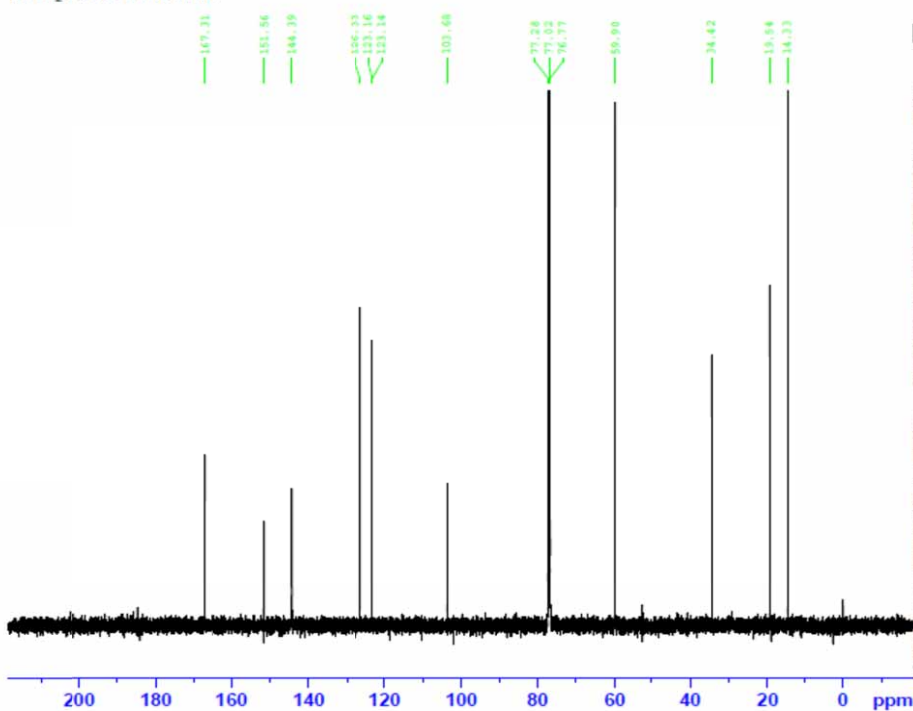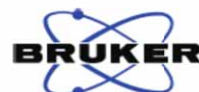

```
Current Data Parameters
NAME      Bhadra
EXPNO    582
PROCNO   1

F2 - Acquisition Parameters
Date_    20140615
Time     15.11
INSTRUM spect
PROBHD   5 mm PABBO BB/
PULPROG zgpg30
TD       65536
SOLVENT  CDCl3
NS       1024
DS       4
SWH      29741.904 Hz
FIDRES   0.454131 Hz
AQ       1.1010048 sec
RG       112.97
DW       16.800 usec
DE       6.50 usec
TE       300.2 K
D1       2.00000000 sec
D11      0.03000000 sec
TDO      1

----- CHANNEL f1 -----
SFO1    125.7603047 MHz
NUC1     13C
P1       8.90 usec
PLW1     29.00000000 W

----- CHANNEL f2 -----
SFO2    500.0920004 MHz
NUC2     1H
CPDPRG[2] waltz16
PCPD2    80.00 usec
PLW2     17.00000000 W
PLW12    0.52061999 W
PLW13    0.33200001 W

F2 - Processing parameters
SI       32768
SF       125.7477310 MHz
WDW      RM
SSB      0
LB       1.00 Hz
GB       0
PC       1.40
```

Mass spectrum of diethyl 2, 6-dimethyl-4-(pyridine-4-yl)-1,4-dihydropyridine-3,5-dicarboxylate (2f)

Exact mass: 330.16

Mass obtained in the positive mode: 331.0641

Elemental composition: C<sub>18</sub>H<sub>22</sub>N<sub>2</sub>O<sub>4</sub>

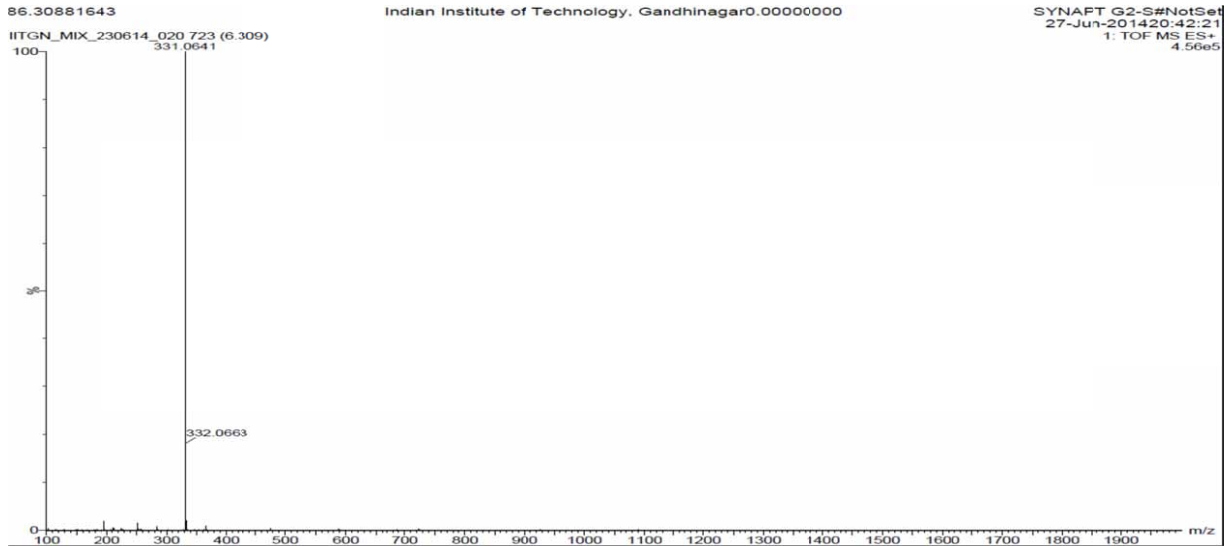

<sup>1</sup>H NMR Spectrum of diethyl 2, 6-dimethyl-4-(pyridine-4-yl)-1,4-dihydropyridine-3,5-dicarboxylate

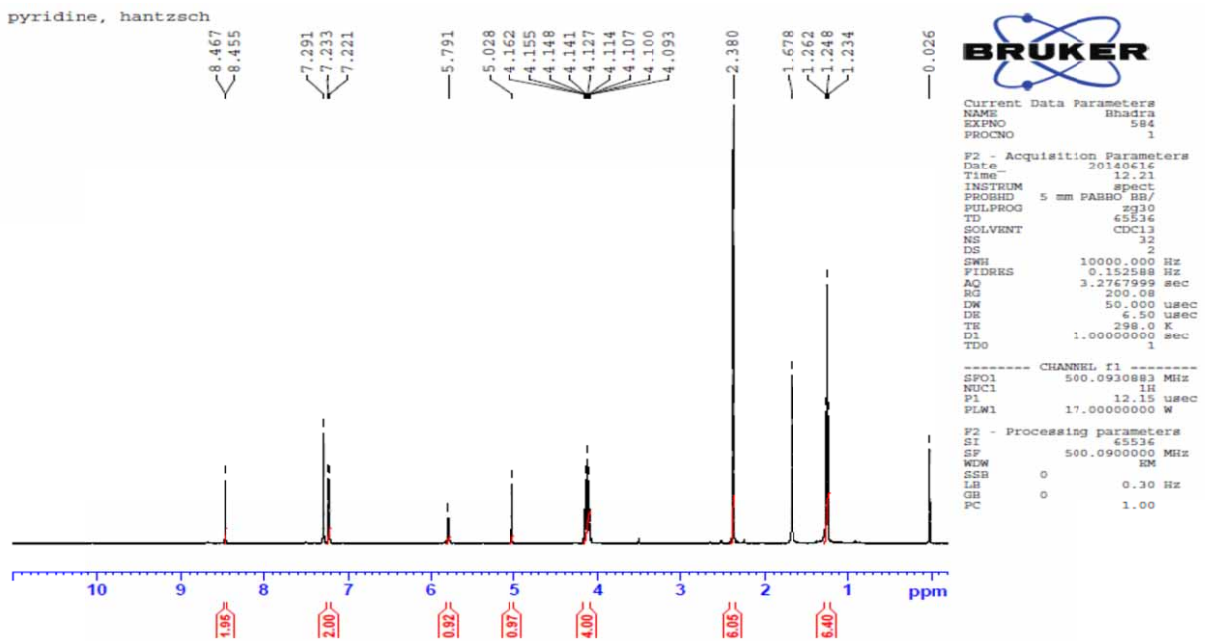

pyridine, hantzsch

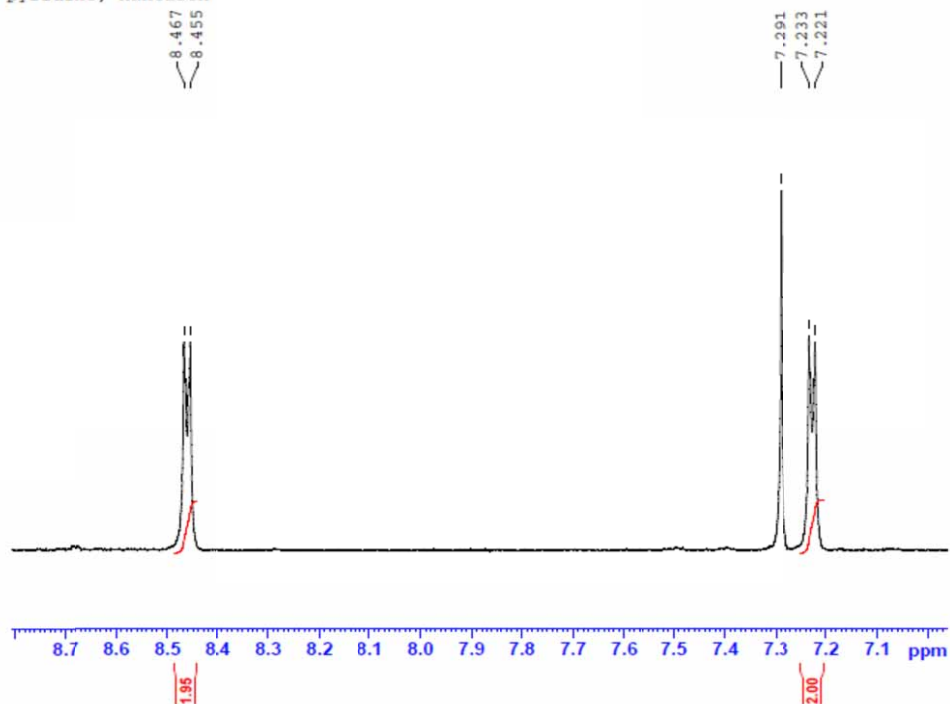

<sup>13</sup>C NMR Spectrum of diethyl 2, 6-dimethyl-4-(pyridine-4-yl)-1,4-dihydropyridine-3,5-dicarboxylate

pyridine, hantzsch

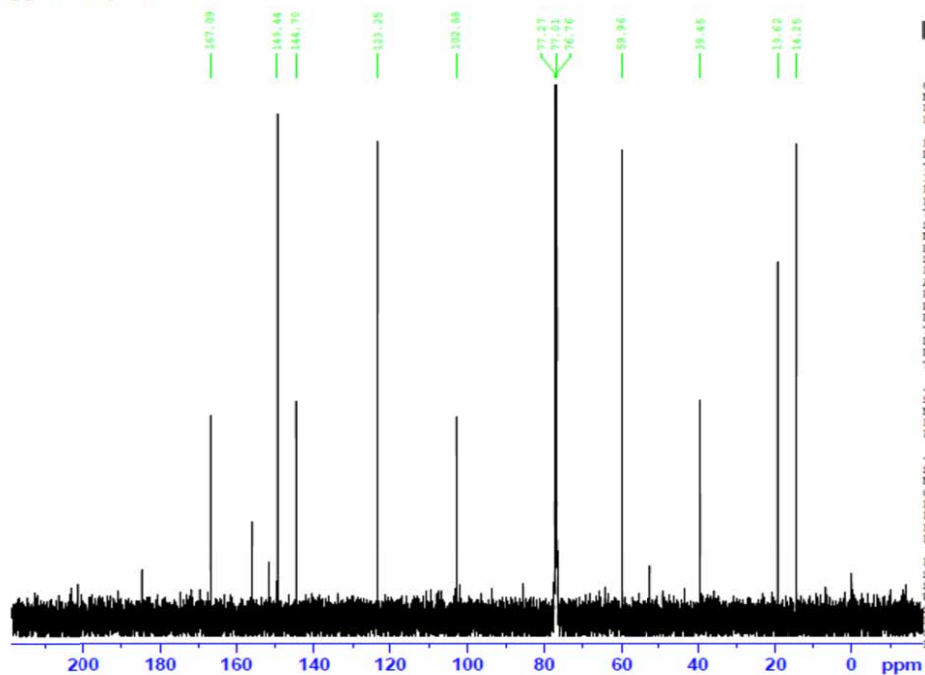

Supplement: c4ra08353a1.pdf [file c4ra08353a1.pdf]
